1 **Stem Cell Transplantation Rescued A Primary Open-Angle Glaucoma Mouse**  
2 **Model**

3  
4

5 Siqi Xiong<sup>1,2</sup>, Ajay Kumar<sup>1</sup>, Shenghe Tian<sup>1</sup>, Eman E. Taher<sup>1,3</sup>, Enzhi Yang<sup>1</sup>, Paul R.  
6 Kinchington<sup>1</sup>, Xiaobo Xia<sup>2</sup>, Yiqin Du<sup>1,4,5\*</sup>

- 7 1. Department of Ophthalmology, University of Pittsburgh, Pittsburgh, PA 15213  
8 2. Eye Center of Xiangya Hospital, Central South University, Changsha, Hunan,  
9 China 410008  
10 3. Research Institute of Ophthalmology, Giza, Egypt 12557  
11 4. Department of Developmental Biology, University of Pittsburgh, Pittsburgh, PA  
12 15213  
13 5. McGowan Institute for Regenerative Medicine, University of Pittsburgh,  
14 Pittsburgh, PA 15213

15 \*Corresponding author:  
16 Yiqin Du, [duy@upmc.edu](mailto:duy@upmc.edu); 910 Eye and Ear Institute, 203 Lothrop St, Pittsburgh, PA  
17 15213. Tel: 412-802-8437

18  
19  
20  
21  
22  
23  
24  
25  
26  
27  
28

29 **Abstract**

30 Glaucoma is a leading cause of irreversible blindness. In this study, we investigated if  
31 exogenous stem cells are able to rescue a glaucoma mouse model with transgenic  
32 myocilin Y437H mutation and explored the possible mechanisms. Human trabecular  
33 meshwork stem cells (TMSCs) were intracamerally transplanted which reduced  
34 mouse intraocular pressure, increased outflow facility, protected the retinal ganglion  
35 cells and preserved their function. TMSC transplantation also significantly increased  
36 the TM cellularity, promoted myocilin secretion from TM cells into the aqueous humor  
37 to reduce endoplasmic reticulum stress, repaired the TM tissue with extracellular  
38 matrix modulation and ultrastructural restoration. Co-culturing TMSCs with myocilin  
39 mutant TM cells in vitro promoted TMSCs differentiating into phagocytic functional TM  
40 cells. RNA sequencing revealed that TMSCs had upregulated genes related to TM  
41 regeneration and neuroprotection. Our results uncovered therapeutic potential of  
42 TMSCs for curing glaucoma and elucidated possible mechanisms by which TMSCs  
43 achieve the treatment effect.

44

45

46 **Key Words:** Trabecular meshwork, Stem cells, Transplantation, Glaucoma,  
47 Intraocular pressure, RNAseq.

48

49

50

51

52

53

54

55

56

57

## 58 **Introduction**

59 Primary open-angle glaucoma (POAG), the most common type of glaucoma with a  
60 prevalence of 0.5-7.0% in adults, can result in damage of retinal ganglion cells (RGCs)  
61 and irreversible vision loss(Broman et al., 2008; Quigley & Broman, 2006) . The  
62 progression of POAG has been demonstrated to be correlated with elevated  
63 intraocular pressure (IOP)(Heijl et al., 2002), which is associated with reduced  
64 trabecular meshwork (TM) cellularity (Alvarado, Murphy, & Juster, 1984; Alvarado,  
65 Murphy, Polansky, & Juster, 1981), malfunction of TM phagocytosis(Buller, Johnson,  
66 & Tschumper, 1990) and abnormal deposition of extracellular matrix (ECM)(Gong H,  
67 2016; Keller, Aga, Bradley, Kelley, & Acott, 2009). Replenishment of the TM cells with  
68 stem cells and restoration of the TM function offers a novel alternative approach to  
69 treat POAG(Abu-Hassan, Li, Ryan, Acott, & Kelley, 2015; Du et al., 2012; Du, Yun,  
70 Yang, & Schuman, 2013; Kelley et al., 2009; Yun et al., 2018; Zhou et al., 2020; Zhu  
71 et al., 2016).

72 Trabecular meshwork stem cells (TMSCs) have their special niche located at the  
73 anterior TM tissue beneath the Schwalbe's line(Braunger et al., 2014; Raviola, 1982;  
74 Sundaresan, Veerappan, Ramasamy, & Chidambaranathan, 2019; Yun, Zhou, Wills,  
75 & Du, 2016) and have been successfully isolated and characterized(Castro & Du,  
76 2019; Du et al., 2012). TMSCs maintain stem cell characteristics and regenerative  
77 capacity after long-term cryopreservation (Kumar, Xu, & Du, 2020) which can be an  
78 effective source for cell-based therapy. After intracameral injection, TMSCs exhibit the  
79 preference to home to the TM region in wildtype mice (Du et al., 2013) and to laser-  
80 damaged TM tissue, which is correlated with CXCR4/SDF1 chemokine axis(Yun et  
81 al., 2018). Moreover, TMSCs can improve the outflow facility in a mouse model with  
82 laser-induced TM damage(Yun et al., 2018). However, the mechanisms for TMSCs  
83 repairing the diseased TM and restoring TM function in POAG have not yet been  
84 resolved. Intriguingly, the pathogenesis of POAG is apparently different from that of  
85 laser induced glaucoma(Liesenborghs et al., 2019). Hence, exploring the therapeutic

86 effect of TMSCs on models of POAG and uncovering mechanisms underlying it are  
87 crucial steps for future clinical therapies for treating glaucoma.

88 Several factors, such as environment and genetics, have been found to contribute  
89 to the occurrence and development of POAG(Janssen et al., 2013). Mutations in the  
90 gene encoding Myoc have been confirmed to be associated with glaucoma(Tamm,  
91 2002) which are responsible for 4% of adult-onset POAG and 10% of juvenile-onset  
92 POAG. Although Myoc mutation glaucoma is a subtype of POAG, the pathophysiology  
93 of POAG in common is associated with reduced TM cellularity, abnormal deposition  
94 of ECM and increased IOP. Myoc mutations alter the structure of Myoc protein and  
95 result in the retention of misfolded Myoc in the endoplasmic reticulum (ER) of TM cells.  
96 The accumulated protein can then induce ER stress in TM cells, which is related to  
97 glaucoma(Peters, Bhattacharya, Clark, & Zode, 2015). ER stress can also lead to TM  
98 dysfunction, abnormal synthesis and turnover of ECM and loss of RGCs(Fingert,  
99 Stone, Sheffield, & Alward, 2002). A mouse POAG model with transgenic-Myoc  
100 Y437H mutation (Tg-MyocY437H) closely mimics the pathophysiology of human  
101 Myoc-associated glaucoma(Zhou, Grinchuk, & Tomarev, 2008; Zode et al., 2012;  
102 Zode et al., 2011). Here, we report that human TMSCs that are intracamerally  
103 transplanted to the Tg-MyocY437H POAG mice, can repopulate the TM cells, repair  
104 the abnormal TM tissue and preserve the function of RGCs. By analyzing the RNA  
105 sequencing (RNAseq) data from three strains of human TMSCs and corneal  
106 fibroblasts from different donors, we have identified the expression differences for  
107 unveiling the TMSC regeneration mechanisms.

108

## 109 **Results**

### 110 **TMSCs Reduce IOP and Increase Outflow Facility of the Tg-MyocY437H Mice**

111 Human TMSCs were isolated as previously described(Yun et al., 2018) and  
112 characterized by flow cytometry to confirm the positive expression of stem cell markers  
113 CD73, CD90, CD105, CD166, and negative expression of CD34 and CD45 as  
114 previously reported(Kumar et al., 2020; Yun et al., 2018). To investigate therapeutic



115 effect of TMSCs on POAG, human TMSCs at passage 3 or 4 were injected into the  
116 anterior chamber of the Tg-MyocY437H mice when they were at age of 4-month. Age-  
117 matched wildtype (WT) mice served as control. The baseline IOP of 4-month old Tg-  
118 MyocY437H mice was  $16.5\pm 0.44$  mmHg (Figure 1A), which was significantly higher  
119 than that of WT mice ( $12.38\pm 0.41$  mmHg,  $p < 0.0001$ ). Tg-MyocY437H mice  
120 transplanted with TMSCs started to lower IOP from 1 month after stem cell  
121 transplantation, and IOP decreased to  $13.30\pm 0.42$  mmHg (Tg-TMSC) at 1 month. This  
122 was close to that seen in WT mice (WT,  $12.30\pm 0.45$  mmHg,  $p=0.4576$ ). The IOP was  
123 significantly lower than IOP of Tg-MyocY437H mice without treatment (Tg,  $15.23\pm 0.64$   
124 mmHg,  $p=0.0254$ ) and IOP of Tg-MyocY437H mice with medium only injection (Tg-  
125 Sham,  $16.00\pm 0.38$  mmHg,  $p=0.0005$ ). There was no statistically significant difference  
126 of IOPs between untreated (Tg,  $15.23\pm 0.64$  mmHg) and sham (Tg-Sham,  $16.00\pm 0.38$   
127 mmHg,  $p=0.6715$ ). Indeed, the IOP of Tg-MyocY437H mice at 2 months after TMSC  
128 transplantation mice (Tg-TMSC,  $12.65\pm 0.36$  mmHg) reduced to the same level as that  
129 of WT ( $13.03\pm 0.39$  mmHg,  $p=0.9425$ ) and was lower than untreated Tg-MyocY437H  
130 (Tg,  $14.96\pm 0.61$  mmHg,  $p=0.0042$ ) and sham injected mice (Tg-sham,  $15.30\pm 0.21$   
131 mmHg,  $p=0.0006$ ).

132 Meanwhile, we measured mouse night IOP which was more obviously elevated  
133 than day-time IOP as reported before (Zode et al., 2011). In consistent with the day-  
134 time IOP, there was a significant difference of the baseline night IOP between 4-month  
135 old Tg-MyocY437H mice (Figure 1B,  $17.73\pm 2.25$  mmHg) and age-matched WT mice  
136 ( $13.67\pm 2.77$  mmHg,  $P < 0.0001$ ). 2 months after TMSC transplantation, the night IOP  
137 of Tg-MyocY437H mice ( $11.75\pm 2.83$  mmHg) reduced to the same level as that of WT  
138 mice ( $11.55\pm 2.52$  mmHg,  $P=0.9925$ ).

139 To further elucidate if TMSCs reduced IOP in Tg-MyocY437H mice via regulating  
140 the conventional outflow pathway (the TM and the Schlemm's canal), we examined  
141 the outflow facility of the eyes from all groups. As shown in Figure 1C, Tg-MyocY437H  
142 mice displayed higher outflow resistance with lower outflow facility (Tg,  $0.010\pm 0.001$   
143  $\mu\text{L}/\text{min}/\text{mmHg}$ ), while the WT mice showed higher outflow facility (WT,  $0.017\pm 0.001$

144  $\mu\text{L}/\text{min}/\text{mmHg}$ ,  $p=0.0219$ ). Tg-MyocY437H mice with TMSC transplantation for 2  
 145 months showed a significant facilitated outflow (Tg-TMSC,  $0.016\pm 0.002 \mu\text{L}/\text{min}/\text{mmHg}$ )  
 146 as compared to untreated (Tg,  $0.010\pm 0.001 \mu\text{L}/\text{min}/\text{mmHg}$ ,  $p=0.0487$ ) and medium  
 147 injected Tg-MyocY437H mice (Tg-Sham,  $0.009\pm 0.005 \mu\text{L}/\text{min}/\text{mmHg}$ ,  $p=0.029$ ). This  
 148 confirms that TMSCs reduced IOP via improvement of the TM-Schlemm's canal  
 149 conventional outflow pathway.

150 Since corneal thickness can affect the accuracy of IOP measurement, anterior  
 151 OCT was adopted to evaluate the thickness of the cornea, and this revealed that the  
 152 corneas had the same thickness among all groups (Figure 1D-E). Anterior synechia,  
 153 which is an important factor for assessing the efficacy and side effect of stem cell

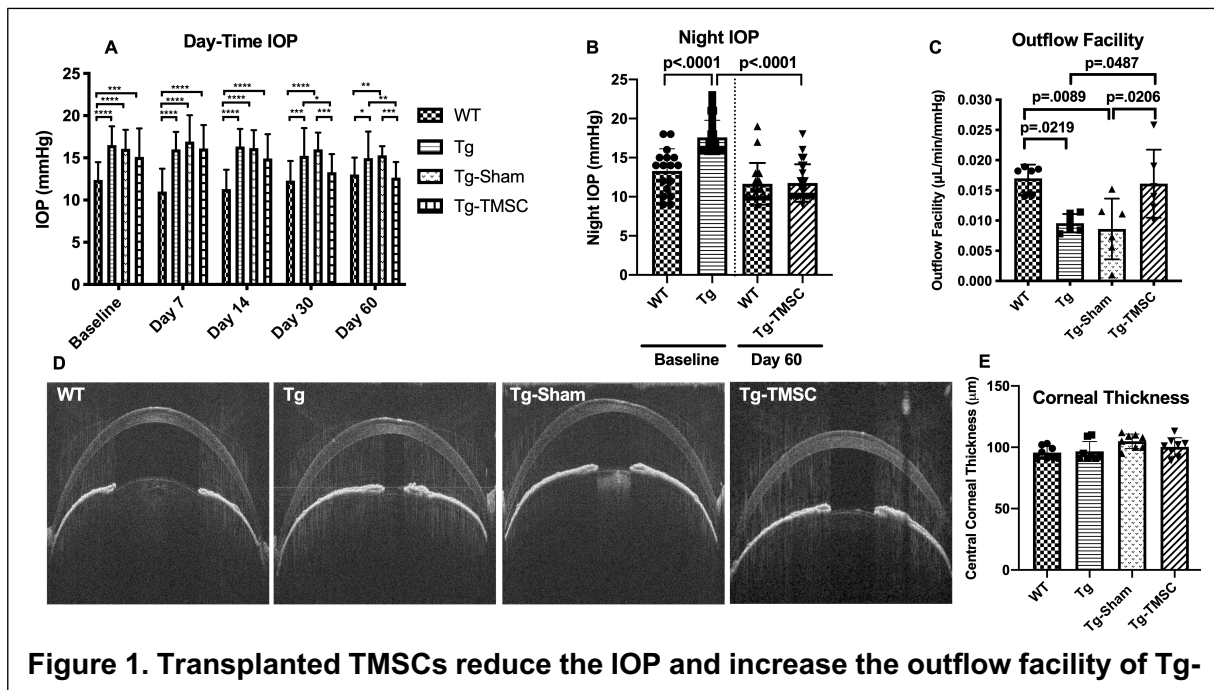

**Figure 1. Transplanted TMSCs reduce the IOP and increase the outflow facility of Tg-MyocY437H mice. (A):** Day-time IOP was measured in the wildtype mice (WT,  $n=26$ ), Tg-MyocY437H mice (Tg,  $n=26$ ), Tg mice treated with basal medium (Tg-Sham,  $n=26$ ) and Tg mice with TMSC transplantation (Tg-TMSC,  $n=26$ ). **(B):** Night IOP was measured in WT mice ( $n=17$ ) and Tg-MyocY437H mice ( $n=24$ ) before the treatment and 2 months post treatment. Data are presented as mean  $\pm$  SD. **(C):** Outflow facility was evaluated at 2-month after TMSC transplantation ( $n=6$  eyes/group). **(D):** Representative pictures of anterior OCT show the corneal thickness and anterior chamber angle in the mice at 2 months after transplantation. **(E):** The central corneal thickness was calculated from the OCT images ( $n=8$  eyes/group). Data are presented as mean  $\pm$  SD. Two-way ANOVA (A) or one-way ANOVA (B,C,E) followed by Tukey's multiple comparisons test. \* $p<0.05$ , \*\* $p<0.01$ , \*\*\* $p<0.001$ , \*\*\*\*  $p<0.0001$ .

154 transplantation, was not found by OCT examination in the mice with intracameral  
155 injection of TMSCs or sham (Figure 1D).

156 **TMSCs Prevent the RGC Loss and Preserve the RGC Function of the Tg-**  
157 **MyocY437H Mice**

158 Preservation and rescuing of RGC function is the goal for the treatment of POAG, so  
159 evaluating the function of RGCs is critical in assessing the therapeutic effect of TMSCs  
160 on POAG. We used the Celeris (Diagnosys LLC) to examine the pattern  
161 electroretinogram (PERG), an optimal approach to detect RGC function. In PERG by  
162 Celeris, the P1 amplitude represents the RGC function (Figure 2A-B). WT mice at 6-  
163 month of age had the P1 amplitude at  $10.84 \pm 0.86 \mu\text{V}$  in the PERG recording, while  
164 39.4% of the RGC function was lost in 6-month old Tg-MyocY437H mice as  
165 calculated with the PERG (Tg,  $P1 = 6.56 \pm 0.63 \mu\text{V}$ ,  $p = 0.0001$ ). 2 months after TMSC  
166 transplantation, nearly 90% of the RGC function of the Tg-MyocY437H mice was  
167 preserved (Tg-TMSC,  $P1 = 9.20 \pm 0.45 \mu\text{V}$ ,  $p = 0.19$ ; WT,  $P1 = 10.84 \pm 0.86 \mu\text{V}$ ,  $p = 0.2869$ )  
168 (Figure 2A-B). Furthermore, we counted the RGC numbers on 5- $\mu\text{m}$  paraffin sections  
169 (Figure 2C, Supplementary Figure 1). There were  $70.48 \pm 2.26$  RGC cells/mm in the  
170 retina of 6-month old WT mice, and  $49.22 \pm 1.79$  cells/mm in that of 6-month old Tg-  
171 MyocY437H mice with RGC loss ( $p < 0.0001$ ). The RGCs were preserved/rescued by  
172 TMSC transplantation in Tg-MyocY437H mice with the RGC number increased to  
173  $60.60 \pm 1.25$  cells/mm ( $p < 0.0001$  as compared to untreated Tg-MyocY437H mice). This  
174 confirms that TMSC transplantation prevented/rescued the RGC loss and preserved  
175 the RGC function in the Tg-MyocY437H mice.

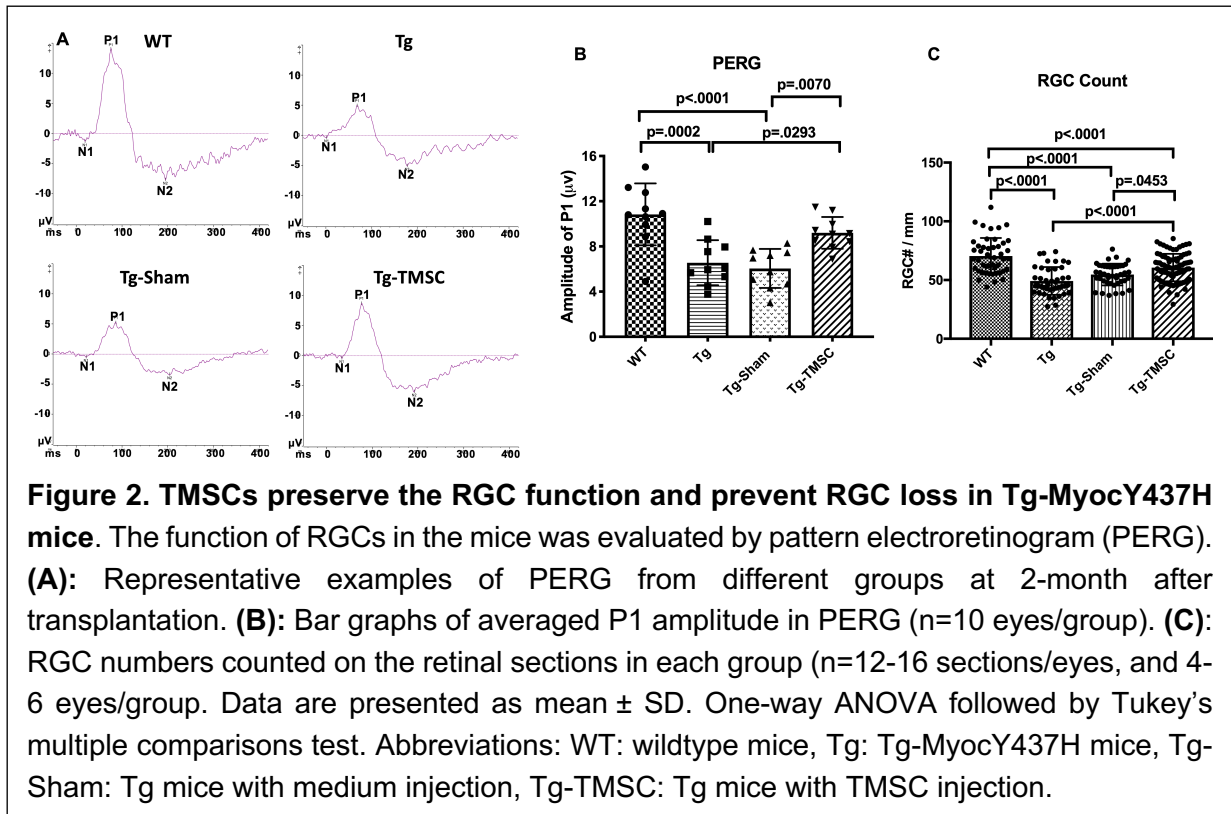

## 176 TMSCs Increase the TM Cellularity of the Tg-MyocY437H Mice

177 To further investigate the mechanisms by which TMSCs reduced IOP and restored  
 178 outflow facility, we evaluated the TM cellularity in the mouse anterior segment  
 179 sections. TM cellularity of the Tg-MyocY437H mice has been reported to be  
 180 decreased due to apoptosis of TM cells in Tg-MyocY437H mice (Zode et al., 2011).  
 181 Collagen IV was used as a marker to define the area of the TM tissue (Zhu et al., 2016).  
 182 We combined the phase contrast black-white images with collagen IV staining to  
 183 accurately identify the TM region and count the cells within the TM region on the  
 184 paraffin sections. As shown in Figure 3A-B, the average number of the cells in the TM  
 185 region was  $35.33 \pm 2.50$  cells/section in 6-month old WT mice (n=10), while 42% and  
 186 51% of reduction of the TM cellularity was observed in the age-matched Tg-  
 187 MyocY437H mice (Tg,  $20.33 \pm 1.11$  cells/section,  $p < 0.0001$ ) and Tg-MyocY437H mice  
 188 with Sham injection (Tg-Sham,  $17.08 \pm 1.18$  cells/section,  $p < 0.0001$ ), respectively.  
 189 TMSC transplantation on Tg-MyocY437H mice increased the TM cell number to  
 190  $28.86 \pm 1.46$  cells/section ( $p = 0.0028$  vs Tg mice,  $p < 0.0001$  vs Tg-Sham).

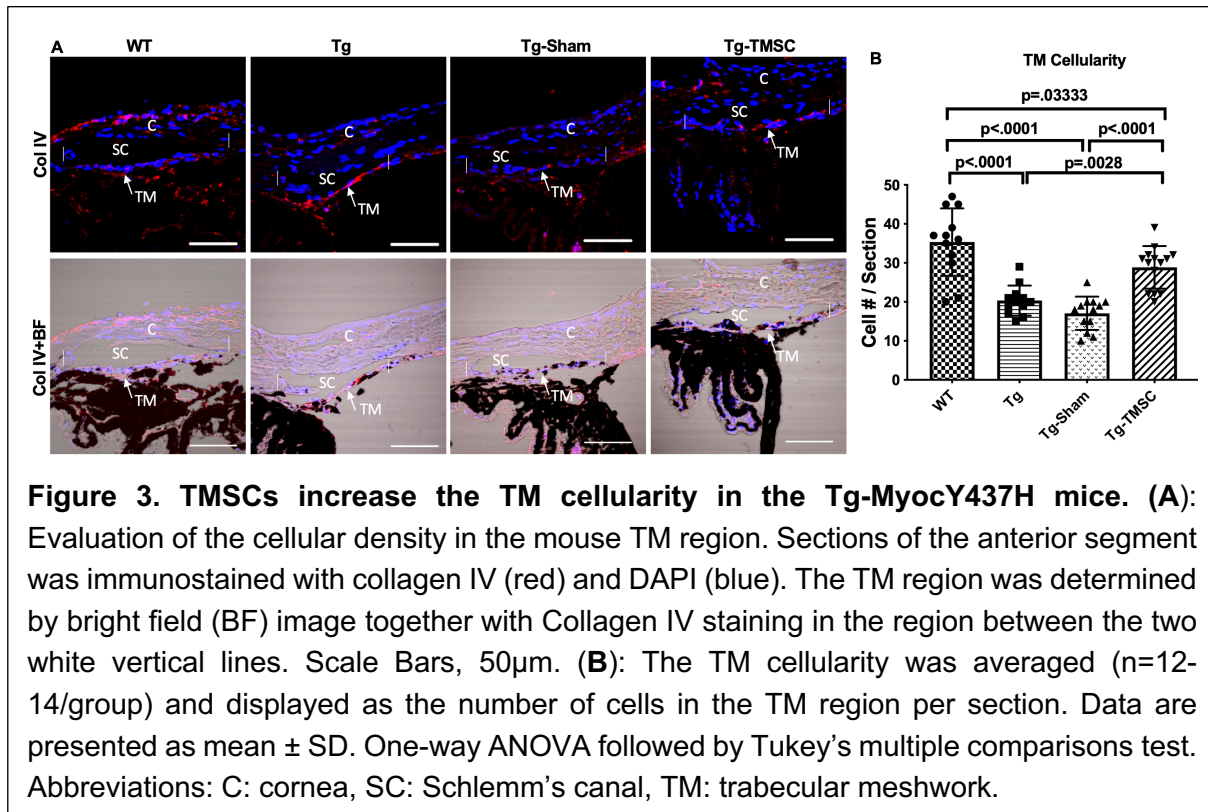

191 **TMSCs Differentiate into TM Cells after Transplantation in the Tg-MyocY437H**  
192 **Mice.**

193 To examine if transplanted TMSCs differentiate into functional TM cells to contribute  
194 to the TM cellularity increase and TM function restoration, we labeled TMSCs with DiO  
195 and injected the cells into the anterior chamber of Tg-MyocY437H mice. 2 months  
196 after TMSC transplantation, we detected DiO-labeled green cells at the mouse TM  
197 region (Figure 4A-C). Some of the DiO+ TMSCs expressed AQP1 and CHI3L1. Anti-  
198 AQP1 antibody detects both mouse and human AQP1 antigen while anti-CHI3L1  
199 antibody used only detects human antigen (Figure 4A). Some of the TMSCs were  
200 positive to anti-Ki67 antibody staining (Figure 4B) indicating the transplanted TMSCs  
201 were active in proliferation 2 months after transplantation. TUNEL staining shows  
202 there were many TUNEL staining apoptotic cells in the Tg-MyocY437H mouse TM  
203 tissue while most of the injected TMSCs and mouse TM tissues were not stained with  
204 TUNEL (Figure 4C-D) indicating the injected TMSCs were alive and protective to the  
205 endogenous TM cells.



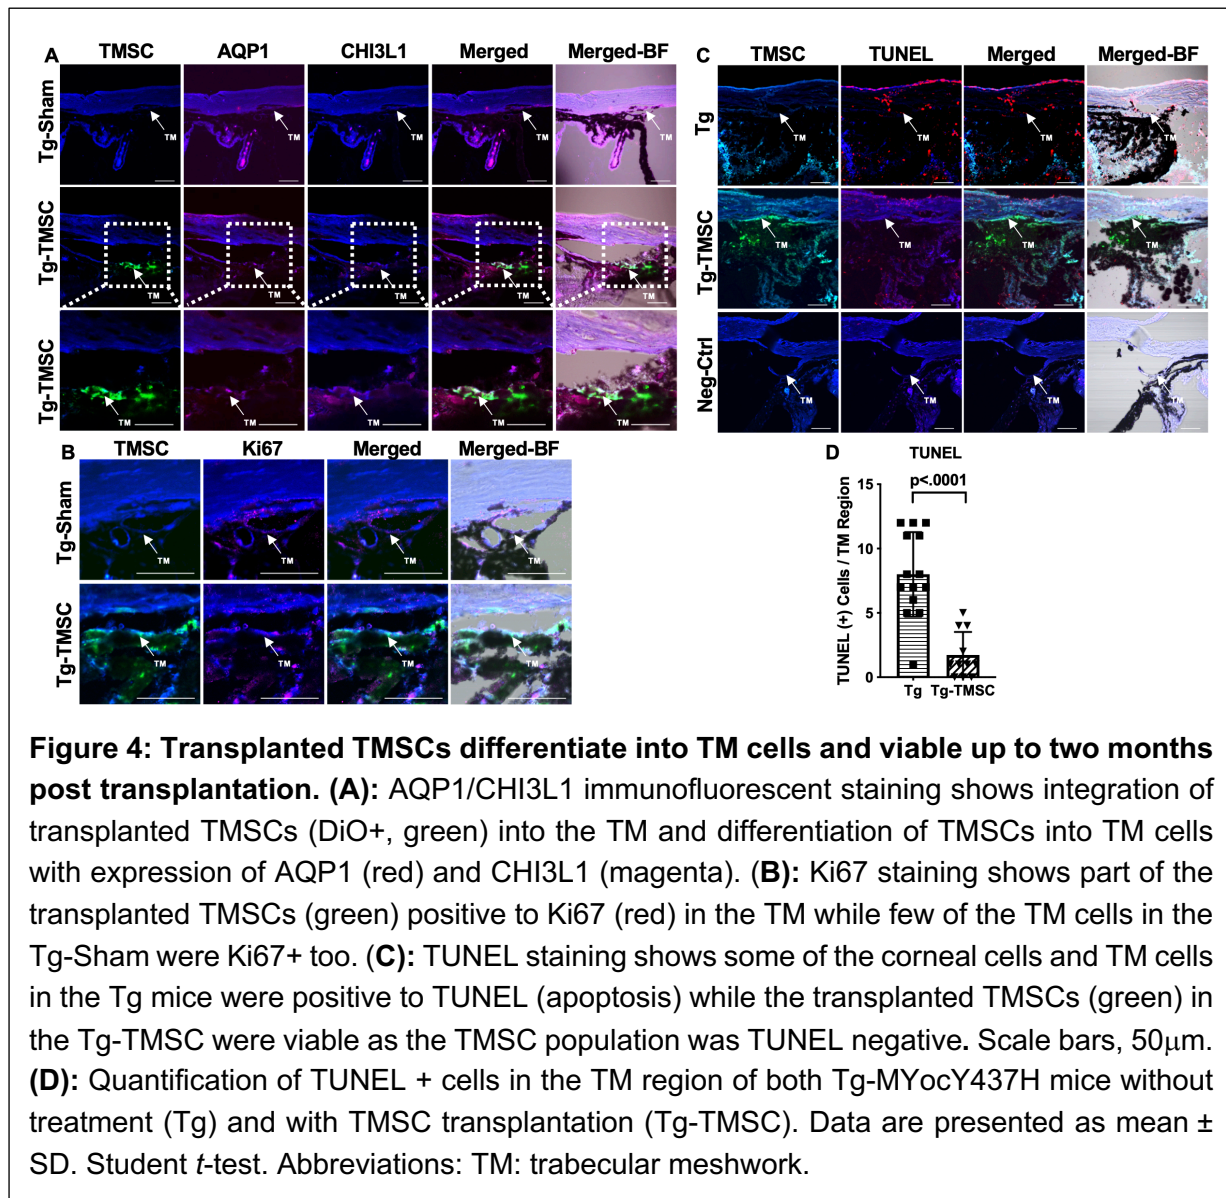

206 **TMSCs Facilitate Myocilin Secretion and Remodel the Extracellular Matrix (ECM)**  
 207 **in the Tg-MYOCY437H mice**

208 Tg-MyocY437H mouse model is characterized by the retention of misfolded Myoc  
 209 protein in the ER of the TM cells and reduced secretion of Myoc protein into the  
 210 aqueous humor(Zode et al., 2011), which are associated with the IOP elevation in this  
 211 mouse model. Immunofluorescent staining on the paraffin sections showed that Myoc  
 212 protein was not detectable in the TM region of WT mice, but it was obviously  
 213 expressed in the TM region of the untreated and sham injected Tg-MyocY437H mice  
 214 (Figure 5A). However, Myoc expression in the TM region was reduced in the Tg-

215 MyocY437H mice receiving TMSC transplantation (Figure 5A). Western blotting on  
216 the limbal tissue confirmed the immunostaining results and showed that TMSC  
217 transplantation reduced Myoc protein accumulation in the limbus of the Tg-  
218 MyocY437H mice (Figure 5B). In contrast, very low levels of Myoc protein could be  
219 detected in the aqueous humor of the Tg-MyocY437H and Tg-Sham mice, but Myoc  
220 protein was increased dramatically in the aqueous humor of WT and in TMSC  
221 transplanted Tg-MyocY437H mice (Tg-TMSCs) (Figure 5B). This indicates that TMSC  
222 transplantation can enhance the secretion of Myoc protein from the TM into the  
223 aqueous humor in the Tg-MyocY437H mice.

224 Abnormal deposition of ECM in the TM tissue is known to contribute to IOP elevation.  
225 Indeed, increased levels of fibronectin and elastin were found in the limbus of the Tg-  
226 MyocY437H and Tg-Sham mice, while collagen IV remained at the similar levels as  
227 that in the WT mice (Figure 5D). However, TMSC transplantation downregulated the  
228 expression of fibronectin and elastin in the TMSC treated Tg-MyocY437H mice to the  
229 levels in the WT mice (Figure 5D). This demonstrates that TMSCs could change the  
230 ECM components in the Tg-MyocY437H mice.

231

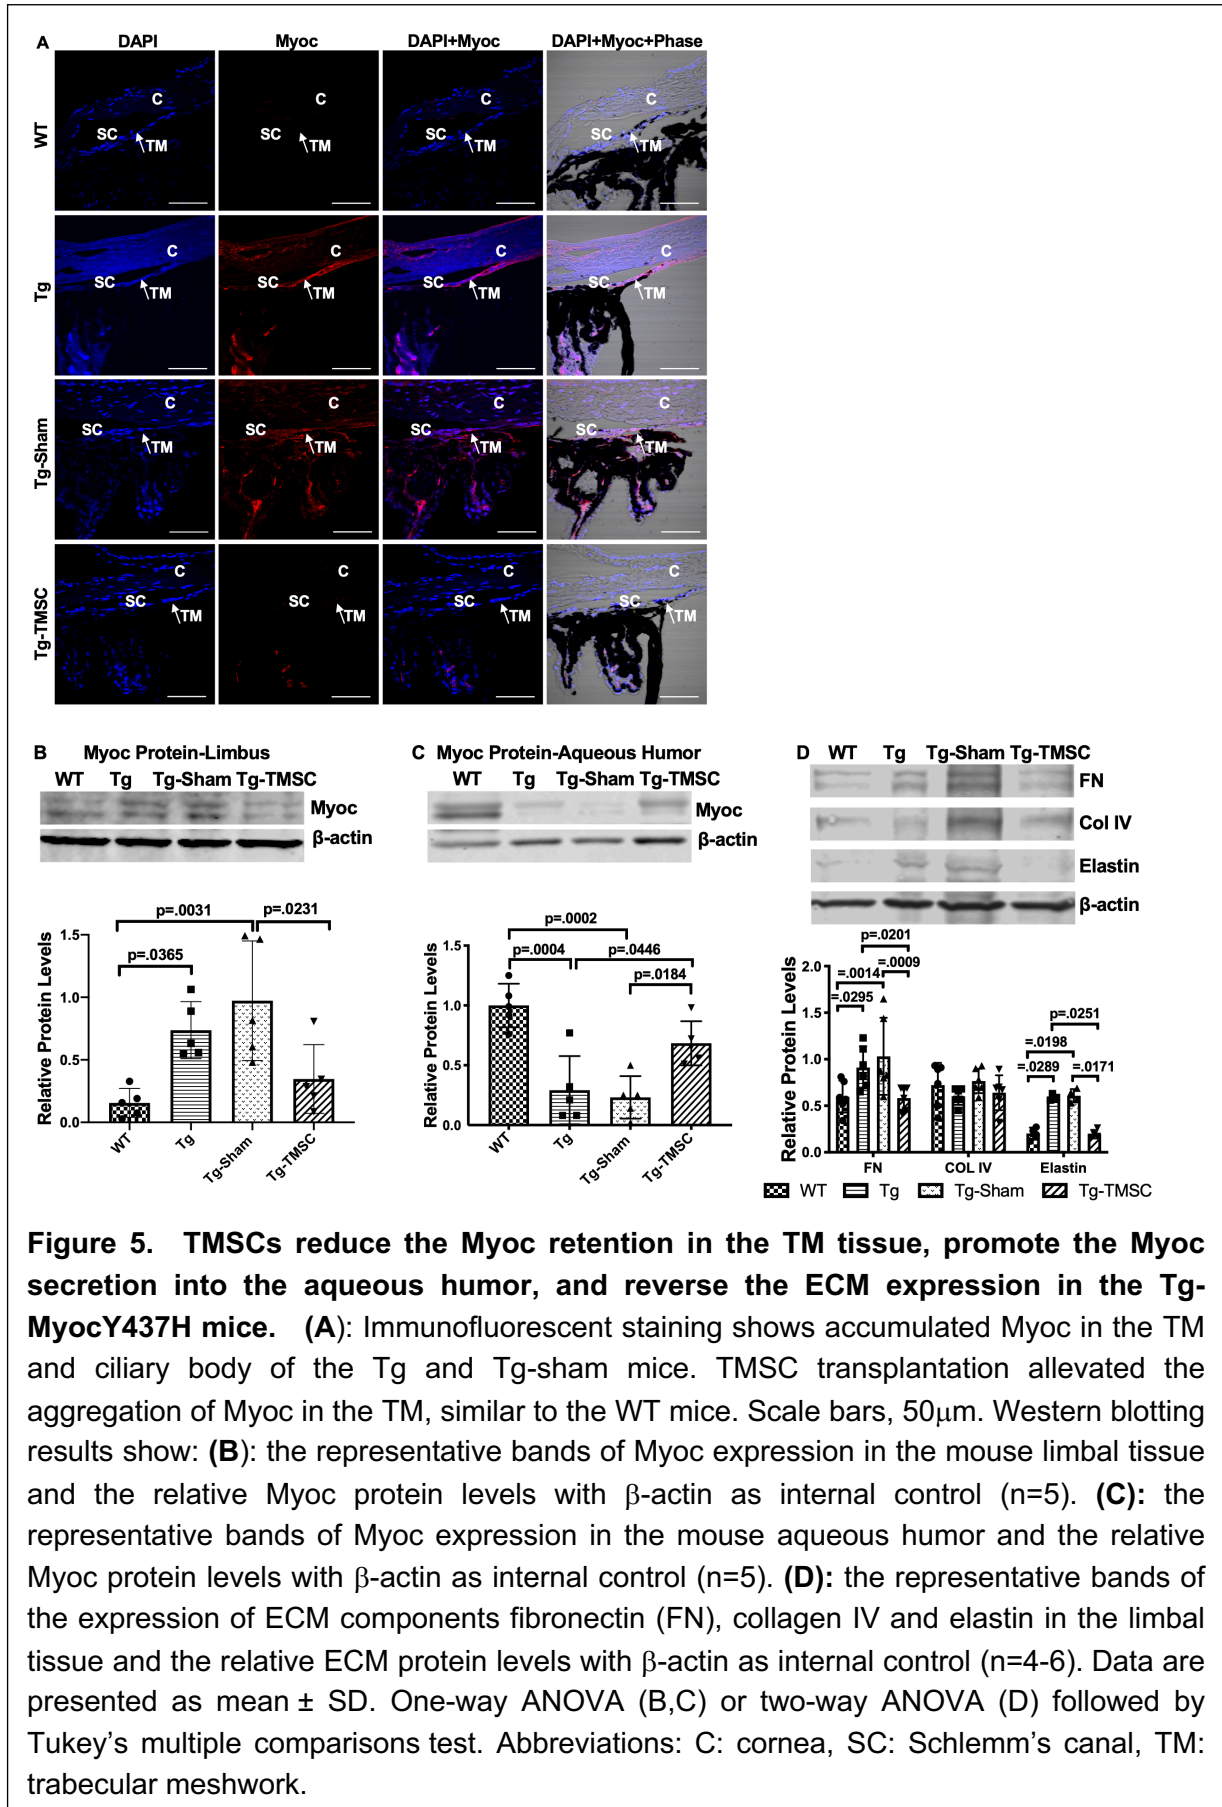



## 232 The Effect of TMSCs on ER Stress in the TM of Tg-MyocY437H Mice

233 To determine if TMSC transplantation could reduce ER stress in the TM of the Tg-  
234 MyocY437H mice, Western blotting was employed to detect the expression of ER  
235 stress markers in the mouse limbal tissue including the TM. The levels of CHOP and  
236 GRP78 were significantly increased in the limbal tissue of Tg-MyocY437H and Tg-  
237 Sham mice in comparison with the WT mice (Figure 6A). The expression of CHOP  
238 and GRP78 in the limbal tissue with TMSC injection was not significantly reduced as  
239 compared to the Tg-MyocY437H mice.

240 We further evaluated the ultrastructure of the TM tissue by transmission electron  
241 microscopy (TEM) and measured the size of the ER and calculated as the ER area  
242 divided by the perimeter ( $\text{nm}^2/\text{nm}$ ). As shown in Figure 6B (arrows) and calculation in  
243 Figure 6C, Tg-MyocY437H mice ( $24.53 \pm 2.81 \text{ nm}^2/\text{nm}$ ) and Tg-Sham mice ( $24.50 \pm$   
244  $3.79 \text{ nm}^2/\text{nm}$ ) presented enlarged ER lumen as compared to the WT mice ( $7.03 \pm 0.54$   
245  $\text{nm}^2/\text{nm}$ ). In contrast, the ER lumen of Tg-MyocY437H mice with TMSC

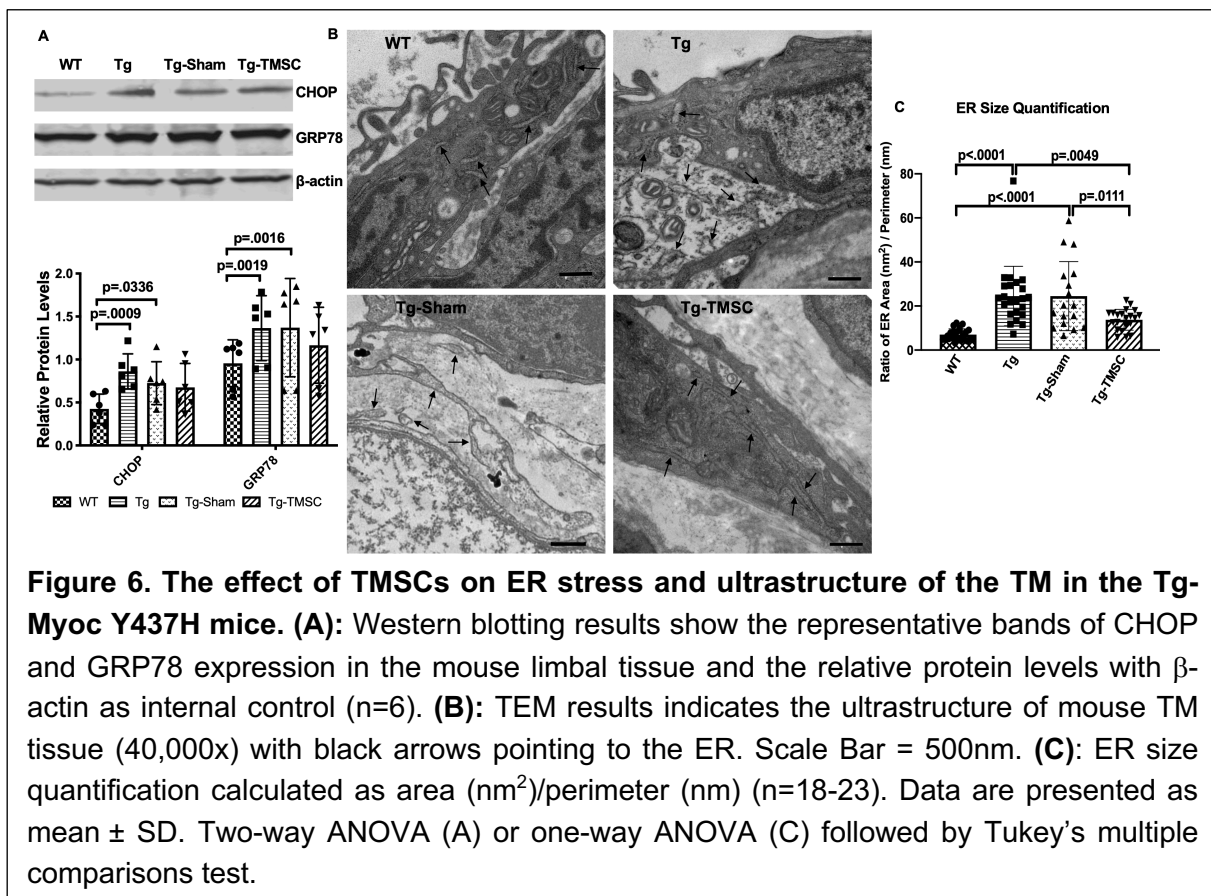

246 transplantation was significantly reduced to  $13.78 \pm 1.02$  nm<sup>2</sup>/nm as compared to  
247 untreated ( $p=0.049$ ) and Sham treated Tg-MyocY437H mice ( $p=0.0111$ ) and more  
248 closely resembled that of WT mice ( $p=0.1423$ ).

249

## 250 **TMSCs Neither Stimulate Proliferation nor Reverse ER Stress of Mutant TM Cells** 251 ***in vitro***

252 To further explore the mechanisms behind regenerative effect of transplanted TMSCs  
253 *in vivo* via increasing TM cellularity, enhancing Myoc secretion, remodeling the TM  
254 ECM and improving ER stress in the TM, we evaluated the effects of TMSCs on  
255 transduced MyocY437H mutant TM cells *in vitro* to detect the interactions between  
256 TMSCs and TM cells. TM cells were transduced with lentivirus which co-expressed  
257 GFP and Myoc with Y437H mutation (Supplementary Figure 2). Transfected GFP-  
258 positive cells were then sorted using flow cytometry and further passaged as a  
259 predominantly GFP+ population of TM cells (Figure 7A) and strongly expressed Myoc  
260 (Figure 7B). Cultured TM cells were confirmed via Western blotting by their  
261 responsiveness to Dex with increased expression of Myoc (Figure 7B) after 100 nM  
262 Dex treatment for 5 days, one of the characteristics of TM cells (Keller et al., 2018).  
263 MyocY437H expressing GFP positive TM cells were cultured alone, with TMSCs in  
264 the Transwell inserts (Figure 7C) or in direct contact with TMSCs and further assessed.  
265 Proliferation of the transduced TM cells was evaluated through analysis of  
266 incorporation rates of the EdU after 2-hour incubation. Mutant Myoc transduced TM  
267 cells showed  $6.53 \pm 1.19\%$  EdU positivity, while  $6.06 \pm 1.78\%$  ( $p=0.8267$ ) and  
268  $6.51 \pm 1.63\%$  ( $p=0.9932$ ) of cells were EdU positive when mutant TM cells were co-  
269 cultured with TMSCs in a Transwell insert or in direct contact with TMSCs, respectively.  
270 This indicated that neither co-culturing nor direct contact with TMSCs could stimulate  
271 proliferation of mutant TM cells (Figure 7D).

272 Next, we evaluated whether TMSCs could reduce ER stress in the Myoc mutant  
273 TM cells. As shown in Figure 7E-F, higher expression of Myoc and ER stress markers  
274 GRP78 and CHOP was detected in the mutant TM cells as compared to normal TM

275 cells and TM cells transduced with GFP only. Co-culturing TM cells with TMSCs in  
 276 the Transwell insert could mimic the interactions seen in vivo between homed TMSCs  
 277 and TM cells. The co-culturing had little effect on reducing ER stress or promoting  
 278 Myoc secretion in the mutant TM cells. The expression of GRP78, CHOP and Myoc  
 279 in the TM cells after co-culturing was similar to that without co-culturing (Figure 7E-F).

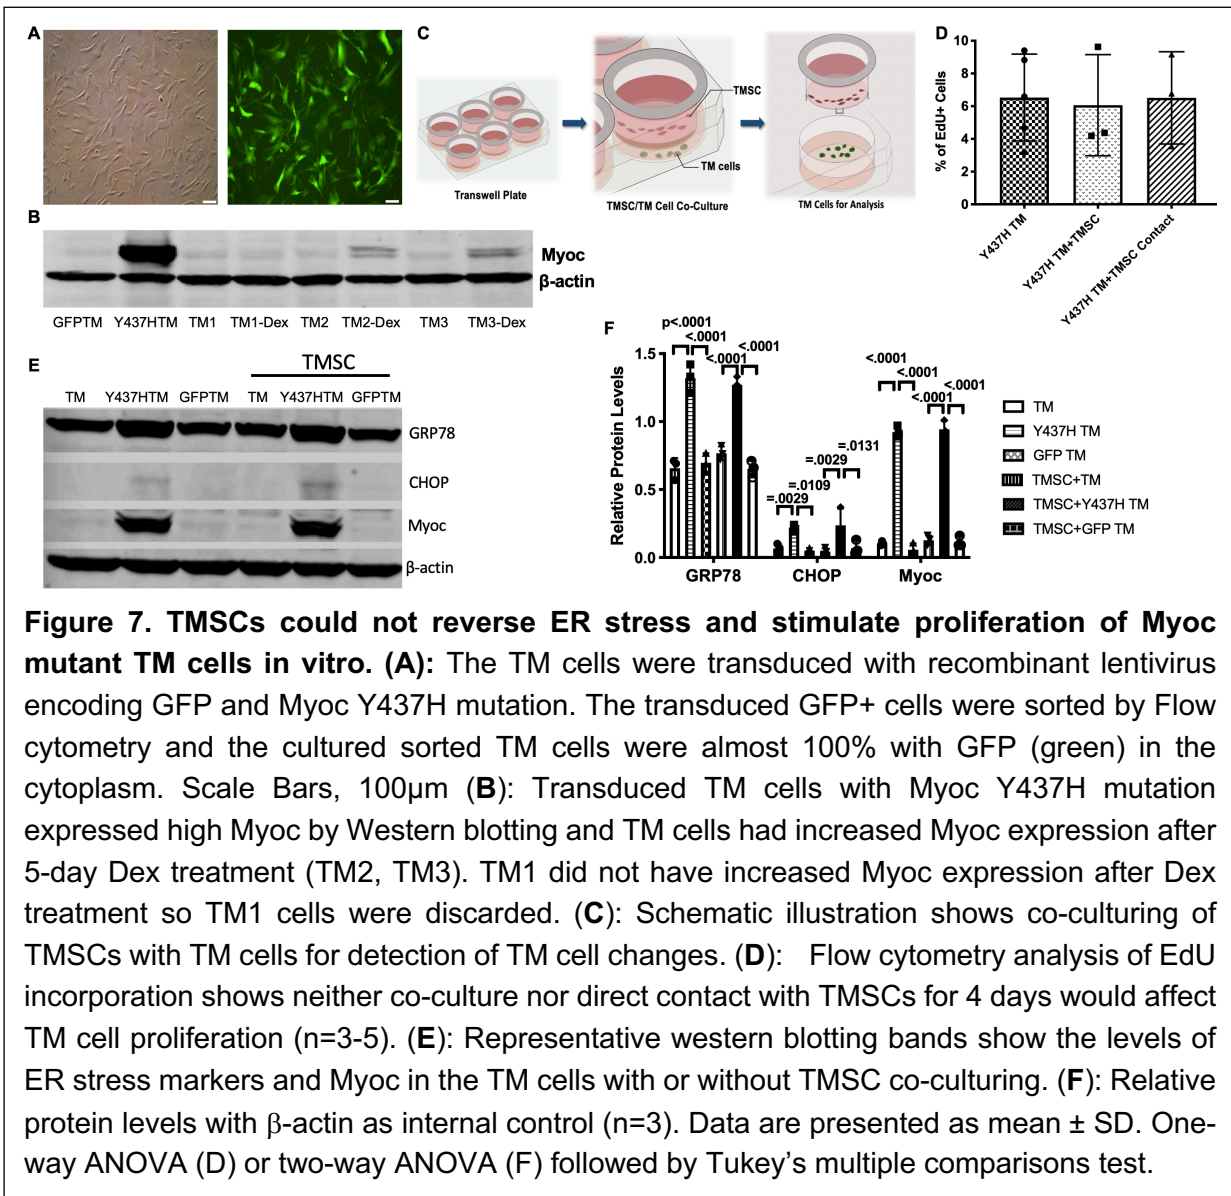

280 **TMSCs Differentiate into TM Cells Responsive to Dexamethasone and Gain**  
 281 **Phagocytic Function under the ER Stress Condition in vitro**

282 One of the mechanisms by which stem cells induce regeneration is differentiation into  
283 cells of desired lineage to compensate for deficient cells in the injured tissue. We  
284 previously reported that TMSCs(Du et al., 2013; Xiong et al., 2020; Yun et al., 2018)  
285 and ADSCs(Zhou et al., 2020) could differentiate into TM cells and express TM  
286 markers after homing to the TM tissues. However, the environment of the Tg-  
287 MyocY437H mouse TM where TMSCs stayed is different. The TM tissue of Tg-  
288 MyocY437H mice possesses ER stress with ECM changes(Kasetti, Phan, Millar, &  
289 Zode, 2016). Understanding whether TMSCs can differentiate to TM cells under ER  
290 stress condition could help to elucidate how TMSCs regulate IOP in the Tg-  
291 MyocY437H mice. We co-cultured TMSCs together with the transduced Myoc mutant  
292 TM cells in a Transwell system (Figure 8A). CHI3L1 expression (Figure 8B) was

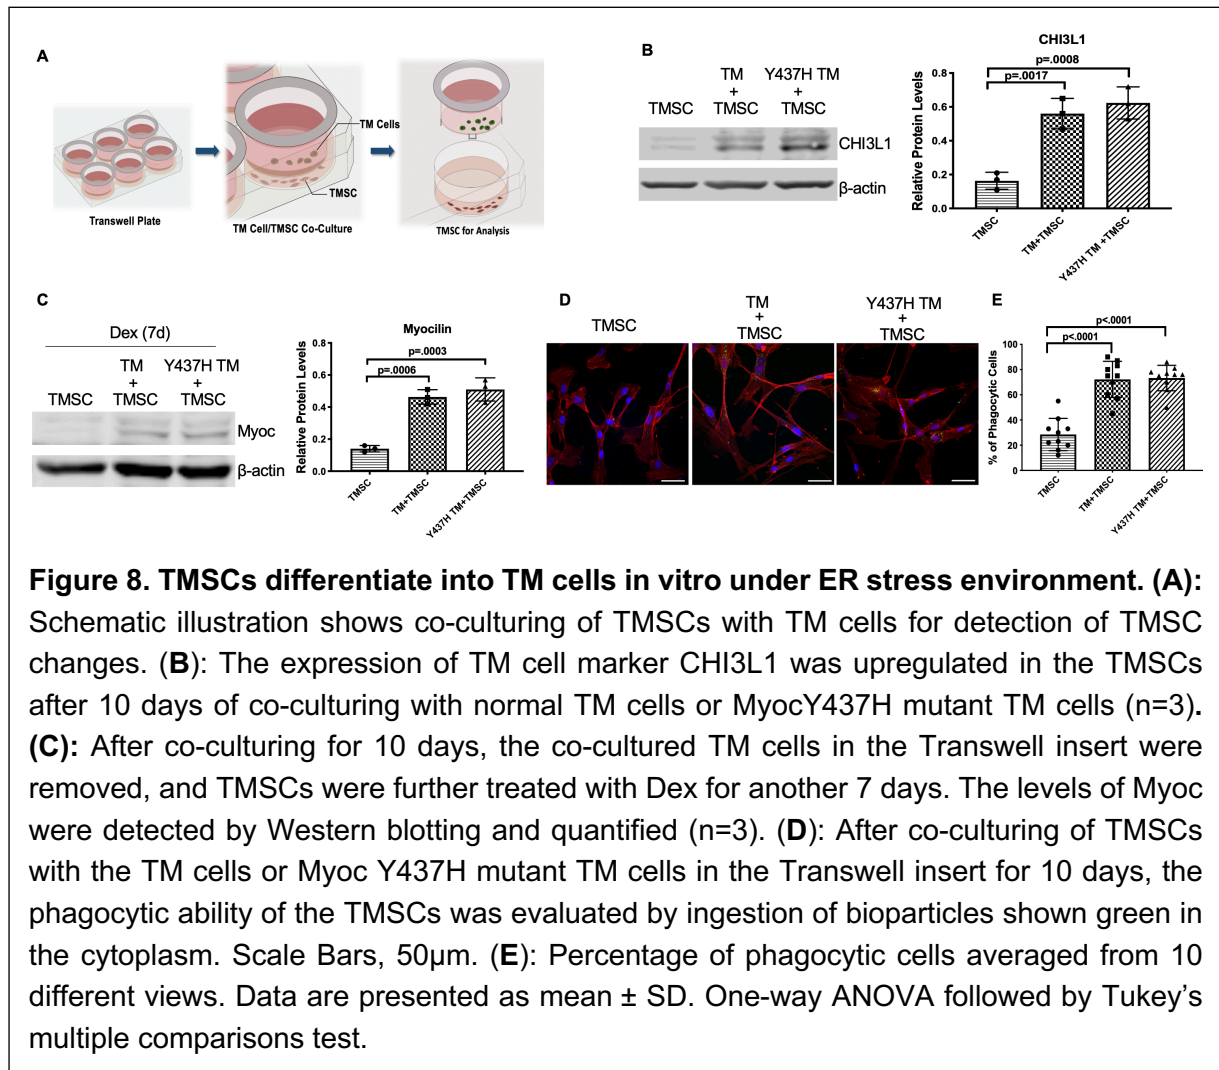

293 significantly increased in the TMSCs after co-culturing with normal TM cells  
294 (TM+TMSC) or with MyocY437H mutant TM cells (Y437H TM+TMSC), in comparison  
295 to TMSCs without co-culture (TMSC). After another 7-day culture of the TMSCs in the  
296 presence of 100 nM Dex, the expression of Myoc (Figure 8C) was significantly  
297 increased in the TMSCs co-cultured with TM cells (TM+TMSC) or mutant TM cells  
298 (Y437H TM+TMSC) while the Myoc expression was almost undetectable without co-  
299 culture (TMSC). TMSCs co-cultured with normal and Myoc mutant TM cells gained  
300 the phagocytic function, evidenced by ingesting fluorescent labeled bioparticles  
301 (Figure 8D-E). Taken together, TMSCs are able to differentiate into TM cells  
302 responsive to dexamethasone treatment and possessing the phagocytic function  
303 under ER stress environment.

#### 304 **TMSCs Had Upregulated Gene Expression Related to TM ECM Maintenance and** 305 **TM Regeneration.**

306 We analyzed the transcriptomes of three individual TMSCs and fibroblasts from  
307 different donors. We observed an upregulation of genes related to maintenance of TM  
308 ECM, integrity and motility like integrin subunit alpha 3 (ITGA3), CHI3L1, vitronectin  
309 (VTN), lysyl oxidase (LOX), follistatin (FST), and collagen type IV alpha 6 chain  
310 (COL4A6)(Liton, Luna, Challa, Epstein, & Gonzalez, 2006) in TMSCs as compared to  
311 fibroblasts (Figure 9A, Supplementary Table 1). Top three upregulated pathways in  
312 TMSCs related to increased TM ECM interaction were (1) focal adhesion pathway  
313 including VTN, collagen type IV alpha 5 chain (COL4A5), myosin light chain kinase  
314 (MYLK), platelet derived growth factor D (PDGFD), and COL4A6; (2) PI3K-Akt  
315 signaling pathway including VTN, COL4A5, PDGFD, and COL4A6; and (3) ECM-  
316 receptor interaction pathway including VTN, COL4A5, heparan sulfate proteoglycan  
317 core protein (HSPG2), and COL4A6 ( Supplementary Table 2). By interactome  
318 analysis for neuroprotective property of TMSCs, we identified many genes related to  
319 neuroprotection, including neuralized E3 ubiquitin protein ligase 1 (NEURL1)  
320 (formation of functional synapses), neurofascin (neurite extension, axonal guidance,  
321 synaptogenesis, myelination, and neuron-glia cell interactions), neuroligin-1/3/4X



322 (synapse function and synaptic signal transmission). Reactome analysis identified  
 323 proteins involved in glutamatergic, dopaminergic, GABAergic pathways activated in  
 324 TMSCs (Figure 9B). Pathway enrichment analysis identified neurotrophin signaling  
 325 pathway and PI3-Akt signaling pathway to be the major pathways related to the  
 326 neuroprotection of RGCs.

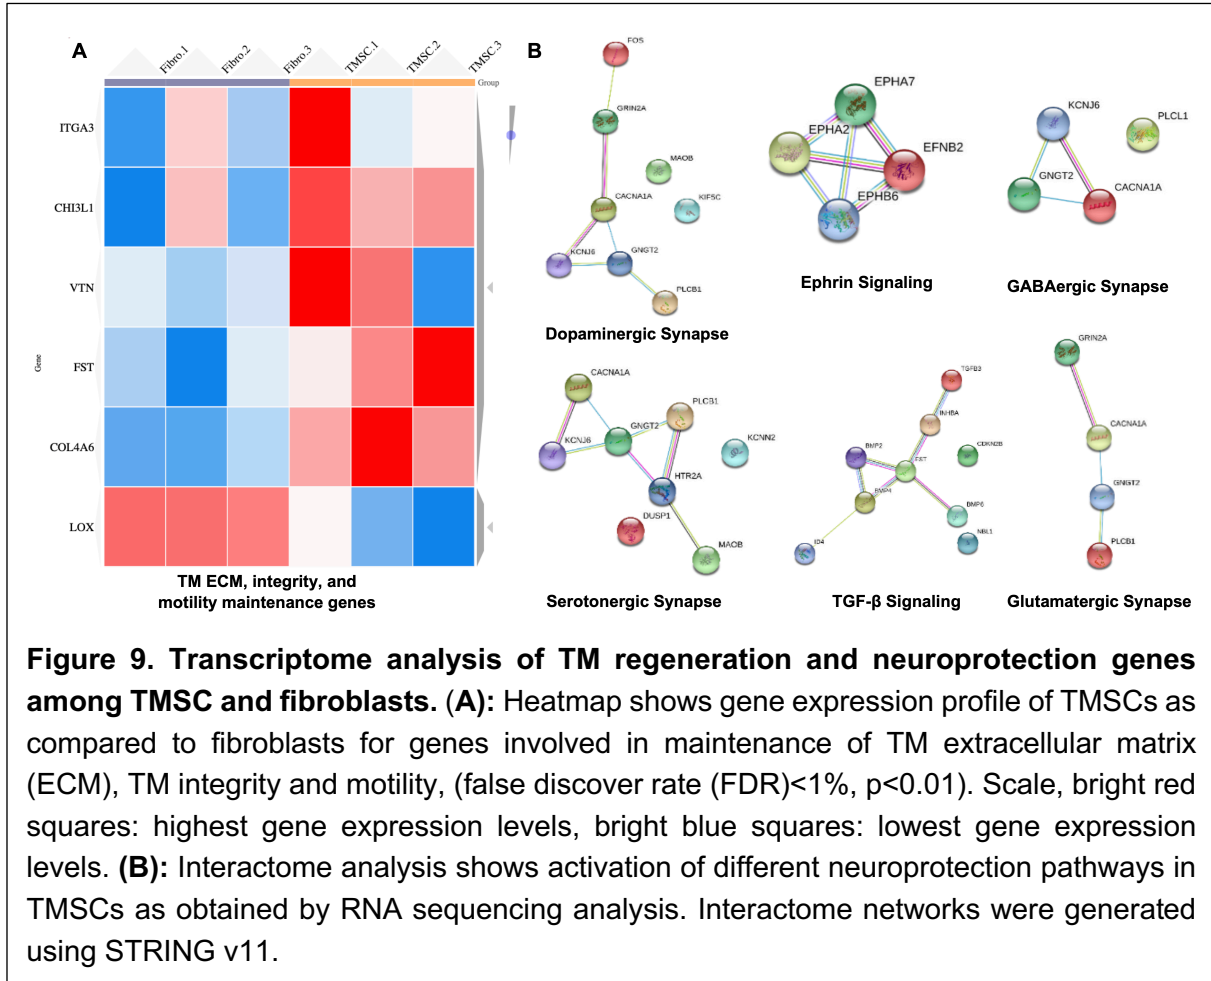

327

## 328 Discussion

329 In this study we demonstrated that human TMSCs transplanted to the anterior  
 330 chamber of transgenic Myoc Y437H mutant mice differentiated to the cells expressing  
 331 TM cell markers at TM region and alleviated many of the parameters associated with  
 332 glaucoma in the validated POAG mouse model. Specifically, transplantation of TMSCs  
 333 reduced the IOP, increased the outflow facility, restored the RGC function with  
 334 significantly improved pattern ERG and preserved the RGCs. With TMSC

335 transplantation, the TM cellularity in the Tg-MyocY437H mice dramatically increased  
336 and the ECM components fibronectin and elastin dramatically reduced in comparison  
337 with untreated and sham injected Tg-MyocY437H mice. Although ER stress marker  
338 expression in the TM tissue was not significantly reduced after TMSC transplantation,  
339 the secreted Myoc into the aqueous humor was significantly increased, while non-  
340 secreted Myoc in the TM tissue was decreased to normal range compared to  
341 untreated and sham-treated Tg-MyocY437H mice. In vitro co-culturing study indicated  
342 that TMSCs could differentiate into Dex-responsive TM cells with phagocytic function  
343 in the presence of normal TM cells or transduced TM cells with Myoc Y437H mutation.  
344 The TMSCs did not reverse ER stress of cultured MyocY437H mutant TM cells in the  
345 co-culture platform. RNAseq analysis showing upregulation of genes related to TM  
346 regeneration including maintenance of TM integrity, motility, and ECM interaction in  
347 TMSCs as compared to fibroblasts might explain that TMSCs induce regeneration in  
348 the Tg-MyocY437H mice via modulation of ECM, promotion of TM integrity and motility,  
349 and increasing the oxidative stress defense mechanism of TM cells. In contrast,  
350 fibroblasts having much lower expression of the abovementioned genes were unable  
351 to produce any regenerative effect as we showed previously(Yun et al., 2018).

352 Our previous studies have shown that the response to ER stress inducers is  
353 different between TMSCs and TM cells(Wang et al., 2019), and TMSCs can  
354 differentiate into TM cells after homing in and retained in normal TM of WT mice(Du  
355 et al., 2013) and in the laser-damaged TM for regeneration(Yun et al., 2018). However,  
356 the microenvironment for the stem cells such as oxygen concentration, PH value,  
357 osmotic pressure, proteases and cytokines, all affects the maintenance, survival, and  
358 regeneration properties of stem cells (Urban, 2002; Wuertz, Godburn, Neidlinger-  
359 Wilke, Urban, & Iatridis, 2008). It was therefore crucial to confirm whether TMSCs  
360 could convert to the TM cells in the Tg-MyocY437H mice with ER stress in the TM  
361 tissue. We demonstrated that TMSCs could differentiate into TM cells expressing the  
362 TM cell marker CHI3L1 (Du et al., 2012; Kelley et al., 2009; Wang et al., 2019) and  
363 possessed phagocytic ability 10 days after co-culturing with the transduced Myoc

364 Y437H mutant TM cells. Phagocytic function of TM cells is responsible for ECM  
365 turnover and maintenance of the outflow pathway by removing cell debris, which is  
366 crucial for regulation of IOP. Moreover, the differentiated TMSCs were responsive to  
367 dexamethasone treatment with increased expression of Myoc, one of the important  
368 characteristics of TM cells(Keller et al., 2018). It indicates that TMSCs can  
369 successfully differentiate to functional TM cells under ER stress condition.

370 The homeostasis of the TM tissue is known to be important for maintaining IOP in  
371 the normal range(Vranka, Kelley, Acott, & Keller, 2015). Some pathological stimuli can  
372 elevate IOP by breaking down TM ECM homeostasis, which results in the excessive  
373 accumulation of ECM composition and insufficient degradation of ECM in the TM  
374 tissue, thereby decreasing the outflow facility(Acott & Kelley, 2008). ER stress arising  
375 from mutant Myoc aggregates in the ER can destroy assembly procedures of ECM  
376 proteins in the TM cells. The ECM components, such as fibronectin, elastin, and  
377 collagen IV were increased in the TM tissue due to abnormal ER function and  
378 pathological cellular status in the Tg-MyocY437H mice(Kasetti et al., 2016).  
379 Conversely, excessive ECM can aggravate ER stress in the TM cells, which can form  
380 a negative feedback to keep the chronic ER stress existing in the Tg-MyocY437H  
381 mice(Kasetti, Maddineni, Millar, Clark, & Zode, 2017). We found that transplantation  
382 of TMSCs can reverse the expression of fibronectin and elastin to the normal levels in  
383 the Tg-MyocY437H mouse TM tissue. Although the reduction of ER stress marker  
384 expression after TMSC transplantation was not significant, the expression levels of  
385 Myoc reduced in the TM tissue and increased in the aqueous humor, and a large  
386 number of cells displayed normal ultrastructure without swollen ER in the TM region  
387 of the Tg-MyocY437H mice with TMSC transplantation. These observations suggest  
388 that differentiated healthy TM cells from TMSCs replaced the mutant TM cells and  
389 remodeled the ECM, improved the function of the diseased TM tissue, which  
390 increased the outflow facility and reduced IOP. A previous report(Zhu et al., 2016)  
391 indicated that transplantation of TM cells derived for iPSCs stimulated the endogenous  
392 TM cell to proliferate to increase the TM cellularity and reduce IOP. Although the cells



393 and underlying mechanisms for the treatment in their study are different from ours,  
394 increased amount of TM cells was found in both studies. It indicates that restoration  
395 of TM cellularity and remodeling of the TM ECM are crucial for cell-based therapy for  
396 glaucoma.

397 Mesenchymal stem cells have been shown to reduce IOP in a laser-induced rat  
398 glaucoma model(Manuguerra-Gagne et al., 2013). The activation of progenitor cells  
399 in the ciliary body which can migrate and differentiate into TM cells in the damaged  
400 tissue might be induced by laser photocoagulation or injected cells. Further research  
401 is needed to elucidate whether TMSCs can recruit the endogenous stem cells to  
402 synergistically repair the TM tissue.

403 Loss of RGCs is responsible for the impairment of visual field and loss of visual acuity  
404 in POAG patients(Rolle, Dallorto, Briamonte, & Penna, 2014; Shoji et al., 2017).  
405 Preserving the RGCs is as important as reducing IOP in treatment for glaucoma(Sena  
406 & Lindsley, 2017; Stern et al., 2018). It is also a critical parameter to evaluate whether  
407 stem cell-based therapy is suitable for the management of glaucoma(Pearson &  
408 Martin, 2015). Elevation of IOP and subsequent loss of RGCs were observed in the  
409 Tg-MyocY437H mice(Zode et al., 2011). Therefore, attention was also paid to the  
410 therapeutic effect of TMSCs on protection of RGC function. In this study, 90% of RGC  
411 function was found to be saved 2 months after TMSC transplantation, while only 60%  
412 of RGC function remained in the 6-month old Tg-MyocY437H mice without treatment  
413 as compared to age-matched WT mice. It indicates that TMSCs can prevent the RGCs  
414 from degeneration resulted from IOP elevation. Nevertheless,10% loss of RGC  
415 function may be attributed to the delayed effect of TMSCs on reducing IOP in this  
416 glaucoma model, in which IOP starts to elevate from 3 months of age while TMSCs  
417 were transplanted at 4 months and the IOP reduction was observed at 5 months.  
418 Therefore, whether earlier intervention can achieve more RGC survival needs further  
419 investigation.

420 We previously reported that TMSCs can regenerate the damaged TM tissue while  
421 corneal fibroblasts did not repair the damaged TM tissue(Yun et al., 2018). Corneal

422 fibroblasts did not express stem cell markers, such as NESTIN or OCT 4, which  
423 TMSCs were positive to and the fibroblasts did not home to and anchoring to the TM  
424 region after intracamerally injection (Du et al., 2013; Xiong et al., 2020). All these  
425 suggest that TMSCs and corneal fibroblasts are distinctive in biological characteristics  
426 and behavior. Thus we compared the transcriptomes between TMSCs and corneal  
427 fibroblasts.

428 Our transcriptome analysis indicates analysis indicates some ECM related genes  
429 and genes associated with ECM modulation pathways like PI3K-Akt signaling pathway,  
430 focal adhesion pathway, ECM-receptor interaction pathway (Villegas et al., 2013) were  
431 highly expressed in TMSCs. Whether TMSCs directly participate in ECM remodeling  
432 through aforementioned ECM related gene and pathways after transplantation  
433 remains to be elucidated. Since we detected that some TMSCs differentiated into TM  
434 cells after homing to the TM region, we speculate that both the differentiated TM cells  
435 from TMSCs and undifferentiated TMSCs participate in the TM ECM modulation.  
436 CHI3L1 has been involved in tissue remodeling and important for normal functioning  
437 of TM(Kumar et al., 2020; Kumar, Xu, Yang, Wang, & Du, 2019; Yun et al., 2018; Zhou  
438 et al., 2020). Integrins are crucial for ECM organization in the TM and help in anchoring  
439 of stem cells to the site of injury for regeneration(Gagen, Faralli, Filla, & Peters, 2014;  
440 Xiong et al., 2020). The upregulation of CHI3L1 and integrins in TMSCs as compared  
441 to fibroblasts further strengthen their regenerative role in the Tg-MYOCY437H  
442 glaucoma model, although the CHI3L1 expression in TMSCs is much lower than that  
443 in TM cells.

444 Some of the genes which are upregulated in TMSCs have been shown to impart  
445 neuroprotective functions. CACNA1A uncovered in TMSC transcriptome (involved in  
446 dopaminergic, GBAergic, serotonergic and glutamatergic synapse) is responsible for  
447 communication between neurons by ion exchange and mutations in the this gene  
448 results into neurological disorder (Ophoff et al., 1996). Similarly, KCNJ5 (GIRK2) are  
449 G-protein-gated potassium channels which are employed in control of hypothermia  
450 induced by activation of GBAergic, muscarinic, kaapa opioid, adenosine and

451 serotonergic receptors(Costa, Stasko, Stoffel, & Scott-McKean, 2005). We speculate  
452 that the preservation of RGCs and their function in Tg-MYOCY437H model by TMSCs  
453 is mainly due to reduced IOP, but these neuroprotective proteins through paracrine  
454 secretion by TMSCs might be also involved in the neuroprotective process. Further  
455 study is required to uncover it.

456

## 457 **Conclusion**

458 Transplanted TMSCs can integrate into the TM tissue and differentiate into functional  
459 TM cells that can repopulate the TM tissue, remodel the TM ECM, and restore the TM  
460 homeostasis to resolve the outflow facility, eventually reducing IOP and preserving  
461 RGCs and their function in the Tg-MyocY437H mouse model of POAG. Myoc mutation  
462 glaucoma as a subtype of POAG contains common pathophysiology of POAG that is  
463 reduced TM cellularity, which causes abnormal deposition of the ECM and increases  
464 IOP and damages the RGCs. Therefore, these results open an important avenue of a  
465 novel stem cell-based strategy to eventually treat human open-angle glaucoma.

466

467

## 468 **Materials and Methods**

### 469 **Animals**

470 Four-month old wildtype (WT) C57BL/6J mice were purchased from Jackson  
471 Laboratory as the normal control, and Tg-MyocY437H mice originated from C57BL/6J  
472 mice were kindly gifted by Dr. Gulab Zode (North Texas Eye Research Institute, Texas)  
473 and transferred to University of Pittsburgh. All the experiments conducted on the  
474 animals were approved by the University of Pittsburgh Institutional Animal Care and  
475 Use Committee and complied with the ARVO Statement for the Use of Animals in  
476 Ophthalmic and Vision Research. Both WT C57B/6J and Tg-MyocY437H C57B/6J  
477 mice were bred in the animal facility at University of Pittsburgh. Mouse DNAs were  
478 isolated by biopsy from mouse ears for genotyping using the primers: 5'-  
479 GACTAAGGCAAGAAAATGAGAATC-3' (Forward) and 5'-

480 CCTCTCCACTCCTGAGATAGC-3' (Reverse). Mice with PCR product at 249 bp were  
481 regarded as carrying the Myoc mutation. The primer pair of 5'-  
482 ACAAAGGCAGGGTTCGAGAAGACAGG-3' (Forward) and 5'-  
483 TTCCCACCTCTCTCTCCCCATGAGA-3' (Reverse) generated a 610 bp product that  
484 was used to confirm the content of mouse DNA (Supplementary Figure 2).

485

#### 486 **Intracameral Transplantation of TMSCs and IOP Measurement**

487 Human TMSCs were isolated and passaged as previous reported (Du et al., 2012;  
488 Wang et al., 2019). Two TMSC strains from two different donors at passage 3 or 4  
489 were used for cell injection. TMSCs were prelabeled with DiO at 50  $\mu\text{g/ml}$  for 30  
490 minutes (Yun et al., 2018) and thoroughly washed with DMEM/F12 and resuspended  
491 in the medium at the concentration of  $1.67 \times 10^7$ /ml for injection. Mice were divided  
492 into four groups: Wildtype group (WT, n=26), age-matched Tg-MyocY437H mice (Tg,  
493 n=26), Tg mice with intracameral injection of the basal medium (Tg-Sham, n=26) and  
494 Tg mice with TMSC transplantation (Tg-TMSC, n=26). Intracameral injection was  
495 following previous published procedures (Du et al., 2013; Yun et al., 2018) with  
496 modifications. In brief, mice at the age of 4 months were anesthetized with ketamine-  
497 xylazine by intraperitoneal injection.  $3\mu\text{l}$  of medium with  $5 \times 10^4$  TMSCs or medium only  
498 (sham) were injected into the mouse anterior chamber using a 33-gauge needle  
499 connected to a 25- $\mu\text{l}$  Hamilton syringe. An I-care tonometer was used to measure  
500 mouse IOP (TonoLab; Colonial Medical Supply, Windham, NH). Day-time IOP  
501 measurements were performed between 1:00 pm and 3:00 pm. Day-time IOP  
502 measurement before injection served as baseline and was conducted at different time  
503 points at week 1, week 2, month 1 and month 2 after transplantation. The night IOP  
504 was measured between 11pm and 1am and included two time points that were pre-  
505 transplantation as baseline and 2 months post transplantation.

506

#### 507 **Measurement of Outflow Facility**

508 The procedure for measuring outflow facility was described previously(Lei, Overby,  
509 Boussommier-Calleja, Stamer, & Ethier, 2011; Yun et al., 2018; Zhou et al., 2020). All  
510 the outflow measurements on mouse eyes were finished within 6 hours after  
511 enucleation. Eyes were irrigated with phosphate buffer saline (PBS) at constant  
512 pressures of 4, 8, 15, and 25 mmHg and outflow was recorded at least 15 minutes at  
513 each pressure after the pressure was stable. Twelve eyes from each group were then  
514 perfused. Outflow facility ( $\mu\text{L}/\text{min}/\text{mmHg}$ ) was calculated using the Goldmann  
515 equation (Lei et al., 2011). Data were accepted when  $R^2$  was greater than 0.95 and  
516 data from at least 6 eyes per group were analyzed and averaged.

517

### 518 **Transmission Electron Microscopy**

519 Transmission electron microscopy (TEM) was used to evaluate the ultrastructure of  
520 the TM as described previously (Yun et al., 2014). After removing the iris, the limbus  
521 tissues ( $n=3$ ) from each group were fixed in Karnovsky's fixative and divided into  
522 quarters of each tissue. Subsequently, the tissues were dehydrated and embedded in  
523 Epon and 65 nm Ultrathin sections were cut, stained with uranyl acetate (Electron  
524 Microscopy Sciences) and Reynold's lead citrate (Fisher). Sections were  
525 photographed at 80 kV on a Jeol 1011 TEM for analysis. For evaluation of ER size,  
526 the boundary of ER on each TEM image was delineated and ER region was colored  
527 by photoshop(Adobe). Then, the area and perimeter of the ER was calculated by  
528 Image pro plus(Media Cybernetics) . The ER size was displayed as ER area/ER  
529 perimeter( $\text{nm}^2/\text{nm}$ ).

530

### 531 **Counting Retinal Ganglion Cells**

532 The mouse eyes were enucleated and fixed in 4% formaldehyde overnight followed  
533 by subsequently dehydration and embedding in paraffin. 5  $\mu\text{m}$  sagittal sections were  
534 stained with hematoxylin and eosin. The sections adjacent to the optic nerve were  
535 used to capture the retina images using a 40x oil objective in a microscopy  
536 (Olympus).The number of cells in the RGC layer was counted throughout the whole

537 retina on four consecutive sections from each eye, and normalized to mean nuclei per  
538 mm.

539

#### 540 **Immunostaining and Counting of TM Cellularity**

541 The mouse eyes were fixed in 4% paraformaldehyde overnight and embedded in  
542 paraffin. After dewaxing, rehydration, heat-induced epitope retrieval and blocking with  
543 10% heat-inactivated goat serum, sections were incubated with primary antibodies to  
544 myocilin (Novus Biologicals), collagen IV(Abcam), Ki67(Abcam), AQP1(Santa Cruz)  
545 and CHI3L1 (R&D Systems) overnight at 4°C. After 3 washes with PBS, corresponding  
546 fluorescent secondary antibodies and 4',6-diamidino-2-phenylindole (DAPI) were  
547 applied to the sections for 1 hour. After 5 washes, slides were mounted and imaged  
548 using a confocal microscope (Olympus IX81) and analyzed on FV10-ASW4.2 Viewer  
549 (Olympus). For measuring TM cellularity, primary antibody against collagen IV,  
550 together with phase contrast images, were used to define the TM region in the sections.  
551 Cell nuclei stained with DAPI within the TM region were counted under FV10-ASW4.2  
552 Viewer. Images of at least 10 fields per group were photographed, and the number of  
553 cell nuclei per field was counted and averaged.

554

#### 555 **TUNEL Analysis**

556 The cell death detection kit (In Situ Cell Death Detection Kit, Sigma-Aldrich) was used  
557 to perform TUNEL analysis according to manufacturer's protocol. The cell nuclei on  
558 the section were stained with DAPI and images were captured under a confocal  
559 microscope (Olympus IX81). 10-14 sections from 3 eyes in each group were stained  
560 and analyzed for TMSC viability 2 month after transplantation.

561

#### 562 **Phagocytosis Assay**

563 Cells were incubated with opsonized Alexa 546-conjugated *S. aureus* bioparticles  
564 (ThermoFisher) at a ratio of 20 bioparticles per cell at 37°C for 1 hour. After incubation,  
565 the cells were washed with PBS, trypsinized and transferred to another 6-well plated

566 with coverslips at the bottom to get rid of any noningested bioparticles. After  
567 attachment, cells were fixed with 4% paraformaldehyde, permeabilized with 0.5%  
568 Triton X-100, and incubated with phalloidin conjugated with AlexFluor-647 and DAPI.  
569 Cellular phagocytosis of bioparticles which were ingested by the cells was observed  
570 within the cytoplasm and photographed under a confocal microscope (Olympus). At  
571 least 10 individual views per condition were counted and averaged. The phagocytic  
572 ability was calculated as following:

$$573 \quad \% \text{ of Phagocytic cells} = \frac{\text{Number of phagocytosed cells/field}}{\text{Total Cell Number/field}} \times 100$$

574

### 575 **Construction of Recombinant Lentivirus** <sup>Myoc Y437H/GFP</sup>

576 Recombinant Lentiviral Vector encoding Myoc Y437H was constructed from  
577 plasmids pLent<sup>CMV-GFP</sup>(Addgene 17448)(Campeau et al., 2009), p<sup>CAGIG2</sup> (Addgene  
578 111159) (Matsuda & Cepko, 2004) and pcDNA3<sup>Myoc Y437H</sup> (Zadoo, Nguyen, Zode, &  
579 Hulleman, 2016). Briefly, pLenti<sup>CMV-GFP-Puro</sup> was digested with BamHI and Sall (NEB)  
580 to remove GFP cassette and served as the vector backbone, which was utilized to  
581 generate lentivirus encoding plasmid (pLenti<sup>CMV-IRES-GFP</sup>) by insertion of IRES-EGFP  
582 cassette (obtained from p<sup>CAGIG2</sup>) into it. The cDNA sequence containing Tyr437His  
583 mutation was amplified from pcDNA3<sup>Myoc Y437H</sup> by using the primers: Forward 5'-  
584 ACACCGACTCTAGAGATGAGGTTCTTCTGTGCACGT-3' and Reverse 5'-  
585 GGCGACCGGTGGATCTCA CATCTTGGAGAGCTTGATG- 3'. It was subsequently  
586 cloned into BamHI site in the pLenti<sup>CMV-IRES-GFP</sup> by In-Fusion cloning kit (Clontech,  
587 639649) to generate lentiviral packaging plasmids(pLenti<sup>CMV-Y437H-IRES-GFP</sup>), which were  
588 co-transfected with ViraPower<sup>R</sup> Lentiviral Packaging Mix (Invitrogen) in to 293T cells  
589 using Lipofectamine 3000 Reagent (Invitrogen, L3000015) for Lentivirus assembly.  
590 The supernatant of transfected cells taken at day 5 was then concentrated with Lenti-  
591 X Concentrator (TakKaRa, 631232) for the collection of recombinant lentivirus  
592 encoding the mutant myocilin (Supplementary Figure 3).

593



## 594 **Cell Culture and Lentivirus Transduction**

595 The donor human corneas containing TM tissue were obtained from the Center for  
596 Organ Recovery and Education (Pittsburgh, PA) and used for isolation of TM cells and  
597 TMSCs. The cells were cultured and passaged as previously reported (Du et al., 2012;  
598 Wang et al., 2019). Human TM cells were cultured in Dulbecco's modified Eagle's  
599 medium (DMEM)/F12 with 10% fetal bovine serum (FBS). Human TMSCs were  
600 cultured in Opti-MEM (Invitrogen) with 5% FBS and a variety of supplements (Du et al.,  
601 2012). The TMSCs and TM cells at passages 3-4 were used for the experiments in this  
602 study.

603 **Lentivirus transduction:** Primary TM cells at passage 3 and 70% confluence were  
604 transduced with lentivirus encoding both mutant Myoc and GFP protein or GFP alone  
605 as a control at a multiplicity of infection (MOI) 3. Polybrene was used at 6 µg/ml to  
606 increase transduction efficiency. GFP positive cells were sorted through Flow  
607 cytometry (BD Biosciences, San Jose, CA) 3 days after transduction and passaged  
608 for the following studies.

609 **Co-culture of TMSCs and TM Cells:** For analyzing the effect of TMSCs on reversing  
610 ER stress and relieving accumulation of mutant Myoc in transduced TM cells,  $5 \times 10^4$   
611 TMSCs were seeded in the upper chamber of 6-well Corning Transwell inserts, while  
612  $5 \times 10^4$  normal TM cells or transduced TM cells with MyocY437H mutation were  
613 maintained at the bottom of the plates. To determine whether TMSCs could stimulate  
614 proliferation of mutant TM cells,  $5 \times 10^4$  TMSCs were plated directly on pre-plated  $5 \times 10^4$   
615 Myoc mutant TM cells or TMSCs were in Transwell inserts as just described and cells  
616 were cocultured for 4 days. To determine if TMSCs could differentiate into TM cells  
617 under ER stress environment,  $5 \times 10^4$  mutant MyocY437H TM cells in the inserts were  
618 cocultured with  $5 \times 10^4$  TMSCs for 10 days. Then, the upper inserts containing mutant  
619 TM cells were removed, the TMSCs in the bottom compartment were utilized for  
620 phagocytosis assay or further cultured with dexamethasone (100 nM) for another 7  
621 days.

622



## 623 **EdU Incorporation and Flow Cytometry Analysis**

624 To determine whether TMSCs influence the proliferation of mutant TM cells, the  
625 MyocY437H TM cells were cultured alone, with TMSCs in the Transwell inserts, or in  
626 direct contact with TMSCs. When cells reached 70% confluence, EdU was added into  
627 the culture medium to reach 10  $\mu$ M concentration and incubated for 2 hours. The cells  
628 were then trypsinized, fixed with 4% paraformaldehyde, permeabilized with 0.5% of  
629 Triton X-100 and blocked with 1% bovine serum albumin (BSA). Subsequently, a  
630 cocktail containing sodium ascorbate (10 mM), azide-fluor 545 (8  $\mu$ M) and copper  
631 sulfate (1 mM) was added and incubated for 10 minutes. Cells not undergoing the  
632 staining procedure, and cells incubating with azide-fluor 545 only were used as  
633 controls. Cell samples were run on the flow cytometer to gate both GFP+ mutant TM  
634 cells and EdU+ cells. The analysis was done using FlowJo\_V10 software (FlowJo,  
635 Ashland, OR) and the percentage of EdU+ cells was counted as the number of  
636 GFP+EdU+ cells divided by GFP+ cells x 100. Each group was replicated at least  
637 three times.

638

## 639 **Western Blotting Analysis**

640 Cultured cells, aqueous humor and mouse limbus tissue were lysed with RIPA buffer  
641 (Santa Cruz Biotechnology). BCA Protein Assay Kit (Pierce Biotechnology) was  
642 utilized for evaluating the concentration of proteins. 30  $\mu$ g total protein was loaded in  
643 each well and electrophoresed on the sodium dodecyl sulfate–polyacrylamide gel  
644 (ThermoFisher) and transferred to the PVDF membrane. After blocking in the blocking  
645 buffer, the membrane was incubated overnight with following primary antibodies  
646 accordingly, anti-CHI3L1, anti-Myoc, anti-elastin (Novus), anti-Grp78, anti-fibronectin  
647 and anti-collagenIV (Abcam). After washing with 0.1% Tween 20 in Tris-buffered  
648 saline for three times, it was incubated with secondary antibodies (IRDye 680LT and  
649 IRDye 800CW, LI-COR Biosciences). Fluorescent signals were captured on an  
650 infrared imager (Odyssey; LI-COR Biosciences). ImageJ was used for the

651 densitometry analysis of protein expression. Each experiment was repeated three  
652 times.

653

### 654 **Anterior Segment Optical Coherence Tomography (OCT)**

655 For evaluation of central corneal thickness and peripheral anterior synechia, an  
656 anterior segment optical coherence tomography (OCT; Visante OCT MODEL 1000;  
657 Carl Zeiss Meditec, Dublin, CA) was used. Eight eyes of each group were examined  
658 by determining quadrant-scans along four axes ( $0^{\circ}$ – $180^{\circ}$ ,  $45^{\circ}$ – $225^{\circ}$ ,  $90^{\circ}$ – $270^{\circ}$ , and  
659  $135^{\circ}$ – $315^{\circ}$ ) to ensure scanning through the central cornea and data along the  $0^{\circ}$  to  
660  $180^{\circ}$  axis were used for analysis.

661

### 662 **Pattern Electroretinography (PERG)**

663 PERG was performed on the Celeris apparatus (Diagnosys LLC, Lowell, MA) to  
664 evaluate the RGC function. Mice (n=10 eyes for each group) were anesthetized with  
665 intraperitoneal injections of the mixture of ketamine and xylazine. The murine pupil  
666 was dilated with 0.5% tropicamide and 2.5% phenylephrine eye drops. A circular  
667 electrode centered on the cornea was placed in a plane perpendicular to the visual  
668 axis. Pattern stimuli consisted of horizontal bars of variable spatial frequencies and  
669 contrast that alternate at different temporal frequency. The parameters for PERG  
670 amplitude were spatial frequency 0.155 cycles/degree, temporal frequency 2.1  
671 reversals/sec, contrast 100% and substantial averaging (600-1800 sweeps). The data  
672 were analyzed by the software Espion V6 (Diagnosys). The amplitude of P1 was used  
673 to analyze the function of RGCs.

### 674 **RNA Sequencing**

675 Three strains of cultured TMSCs and corneal fibroblasts isolated and cultured as  
676 previously described (Du et al., 2009; Yun et al., 2018) from different donors were lysed  
677 in RLT buffer (Qiagen). RNA isolation was performed using RNeasy mini kit (Qiagen)  
678 as per manufacturer's instructions. RNA pellet was treated with Ambion™ RNase-free  
679 DNase in DNase 1 buffer (Invitrogen). Final RNA pellet was dissolved in RNase-free

680 diethyl pyrocarbonate (DEPC) water and sent to GENEWIZ, LLC. (South Plainfield,  
681 NJ, USA) for RNA sequencing. The interactive heatmap was generated using  
682 Clustergrammer(Fernandez et al., 2017) which is freely available  
683 at <http://amp.pharm.mssm.edu/clustergrammer/>. Prior to displaying the heatmap, the  
684 raw gene counts were normalized using the logCPM method, filtered by selecting the  
685 genes with most variable expression, and finally transformed using the Z-score  
686 method with false discover rate (FDR) <1%. Interactome networks were generated  
687 using STRING v11(Szklarczyk et al., 2019).

688

### 689 **Statistical Analysis**

690 The results were expressed as mean  $\pm$  standard deviation (SD). The statistical  
691 differences were analyzed by one-way or two-way ANOVA followed by Tukey's  
692 multiple comparisons test.  $p < 0.05$  was considered statistically significance.

693

### 694 **Acknowledgments**

695 The work was supported by NIH grants EY025643 (YD), P30-EY008098, Research to  
696 Prevent Blindness; and Eye and Ear Foundation (Pittsburgh, PA). The authors thank  
697 Kira Lathrop for assisting with confocal microscopy, Nancy Zurowski with Flow  
698 Cytometry, Katherine Davoli for paraffin sectioning, and Ming Sun for TEM sectioning.

### 699 **AUTHOR CONTRIBUTIONS**

700 S.X.: conception and design, collection of data, data analysis and interpretation,  
701 manuscript writing, final approval of manuscript; A.K.: collection of data, data analysis  
702 and interpretation, manuscript writing, final approval of manuscript; S.T., E.E.T.:  
703 collection of data, data analysis and interpretation, final approval of manuscript; E.Y.:  
704 collection of data, administrative support, final approval of manuscript; P.R.K., X.X.:  
705 data analysis and interpretation, final approval of manuscript; Y.D.: conception and  
706 design, financial support, administrative support, collection of data, data analysis and  
707 interpretation, manuscript writing, final approval of manuscript.

708

## 709 **Data Availability Statement**

710 The data that support the findings of this study are available from the corresponding  
711 author upon reasonable request.

712

## 713 **Uncategorized References**

- 714 Abu-Hassan, D. W., Li, X., Ryan, E. I., Acott, T. S., & Kelley, M. J. (2015). Induced  
715 pluripotent stem cells restore function in a human cell loss model of open-angle  
716 glaucoma. *Stem Cells*, 33(3), 751-761. doi:10.1002/stem.1885
- 717 Acott, T. S., & Kelley, M. J. (2008). Extracellular matrix in the trabecular meshwork. *Exp*  
718 *Eye Res*, 86(4), 543-561. doi:10.1016/j.exer.2008.01.013
- 719 Alvarado, J., Murphy, C., & Juster, R. (1984). Trabecular meshwork cellularity in primary  
720 open-angle glaucoma and nonglaucomatous normals. *Ophthalmology*, 91(6), 564-579.  
721 doi:10.1016/s0161-6420(84)34248-8
- 722 Alvarado, J., Murphy, C., Polansky, J., & Juster, R. (1981). Age-related changes in trabecular  
723 meshwork cellularity. *Invest Ophthalmol Vis Sci*, 21(5), 714-727. Retrieved from  
724 <https://www.ncbi.nlm.nih.gov/pubmed/7298275>
- 725 Braunger, B. M., Ademoglu, B., Koschade, S. E., Fuchshofer, R., Gabelt, B. T., Kiland, J.  
726 A., . . . Tamm, E. R. (2014). Identification of adult stem cells in Schwalbe's line  
727 region of the primate eye. *Invest Ophthalmol Vis Sci*, 55(11), 7499-7507.  
728 doi:10.1167/iovs.14-14872
- 729 Broman, A. T., Quigley, H. A., West, S. K., Katz, J., Munoz, B., Bandeen-Roche, K., . . .  
730 Foster, P. J. (2008). Estimating the rate of progressive visual field damage in those  
731 with open-angle glaucoma, from cross-sectional data. *Invest Ophthalmol Vis Sci*,  
732 49(1), 66-76. doi:10.1167/iovs.07-0866
- 733 Buller, C., Johnson, D. H., & Tschumper, R. C. (1990). Human trabecular meshwork  
734 phagocytosis. Observations in an organ culture system. *Invest Ophthalmol Vis Sci*,  
735 31(10), 2156-2163. Retrieved from <https://www.ncbi.nlm.nih.gov/pubmed/2211012>
- 736 Campeau, E., Ruhl, V. E., Rodier, F., Smith, C. L., Rahmberg, B. L., Fuss, J. O., . . .  
737 Kaufman, P. D. (2009). A versatile viral system for expression and depletion of  
738 proteins in mammalian cells. *PLoS One*, 4(8), e6529.  
739 doi:10.1371/journal.pone.0006529
- 740 Castro, A., & Du, Y. (2019). Trabecular Meshwork Regeneration - A Potential Treatment for  
741 Glaucoma. *Curr Ophthalmol Rep*, 7(2), 80-88. doi:10.1007/s40135-019-00203-2
- 742 Costa, A. C., Stasko, M. R., Stoffel, M., & Scott-McKean, J. J. (2005). G-protein-gated  
743 potassium (GIRK) channels containing the GIRK2 subunit are control hubs for  
744 pharmacologically induced hypothermic responses. *J Neurosci*, 25(34), 7801-7804.  
745 doi:10.1523/JNEUROSCI.1699-05.2005

- 746 Du, Y., Carlson, E. C., Funderburgh, M. L., Birk, D. E., Pearlman, E., Guo, N., . . .  
747 Funderburgh, J. L. (2009). Stem cell therapy restores transparency to defective  
748 murine corneas. *Stem Cells*, *27*(7), 1635-1642. doi:10.1002/stem.91
- 749 Du, Y., Roh, D. S., Mann, M. M., Funderburgh, M. L., Funderburgh, J. L., & Schuman, J. S.  
750 (2012). Multipotent stem cells from trabecular meshwork become phagocytic TM  
751 cells. *Invest Ophthalmol Vis Sci*, *53*(3), 1566-1575. doi:10.1167/iovs.11-9134
- 752 Du, Y., Yun, H., Yang, E., & Schuman, J. S. (2013). Stem cells from trabecular meshwork  
753 home to TM tissue in vivo. *Invest Ophthalmol Vis Sci*, *54*(2), 1450-1459.  
754 doi:10.1167/iovs.12-11056
- 755 Fernandez, N. F., Gundersen, G. W., Rahman, A., Grimes, M. L., Rikova, K., Hornbeck, P.,  
756 & Ma'ayan, A. (2017). Clustergrammer, a web-based heatmap visualization and  
757 analysis tool for high-dimensional biological data. *Sci Data*, *4*, 170151.  
758 doi:10.1038/sdata.2017.151
- 759 Fingert, J. H., Stone, E. M., Sheffield, V. C., & Alward, W. L. (2002). Myocilin glaucoma.  
760 *Surv Ophthalmol*, *47*(6), 547-561. Retrieved from  
761 <https://www.ncbi.nlm.nih.gov/pubmed/12504739>
- 762 Gagen, D., Faralli, J. A., Filla, M. S., & Peters, D. M. (2014). The role of integrins in the  
763 trabecular meshwork. *J Ocul Pharmacol Ther*, *30*(2-3), 110-120.  
764 doi:10.1089/jop.2013.0176
- 765 Gong H, S. D. (2016). The histopathological changes in the trabecular outflow pathway and  
766 their possible effects on aqueous outflow in eyes with primary open-angle glaucoma.  
767 In P. A. K. J. R. Samples (Ed.), *Glaucoma Research and Clinical Advances 2016-*  
768 *2018* (pp. 17-40): Kugler Amsterdam
- 769 Heijl, A., Leske, M. C., Bengtsson, B., Hyman, L., Bengtsson, B., Hussein, M., & Early  
770 Manifest Glaucoma Trial, G. (2002). Reduction of intraocular pressure and glaucoma  
771 progression: results from the Early Manifest Glaucoma Trial. *Arch Ophthalmol*,  
772 *120*(10), 1268-1279. doi:10.1001/archoph.120.10.1268
- 773 Janssen, S. F., Gorgels, T. G., Ramdas, W. D., Klaver, C. C., van Duijn, C. M., Jansonius, N.  
774 M., & Bergen, A. A. (2013). The vast complexity of primary open angle glaucoma:  
775 disease genes, risks, molecular mechanisms and pathobiology. *Prog Retin Eye Res*,  
776 *37*, 31-67. doi:10.1016/j.preteyeres.2013.09.001
- 777 Kasetti, R. B., Maddineni, P., Millar, J. C., Clark, A. F., & Zode, G. S. (2017). Increased  
778 synthesis and deposition of extracellular matrix proteins leads to endoplasmic  
779 reticulum stress in the trabecular meshwork. *Sci Rep*, *7*(1), 14951.  
780 doi:10.1038/s41598-017-14938-0
- 781 Kasetti, R. B., Phan, T. N., Millar, J. C., & Zode, G. S. (2016). Expression of Mutant  
782 Myocilin Induces Abnormal Intracellular Accumulation of Selected Extracellular  
783 Matrix Proteins in the Trabecular Meshwork. *Invest Ophthalmol Vis Sci*, *57*(14),  
784 6058-6069. doi:10.1167/iovs.16-19610
- 785 Keller, K. E., Aga, M., Bradley, J. M., Kelley, M. J., & Acott, T. S. (2009). Extracellular  
786 matrix turnover and outflow resistance. *Exp Eye Res*, *88*(4), 676-682.  
787 doi:10.1016/j.exer.2008.11.023

- 788 Keller, K. E., Bhattacharya, S. K., Borrás, T., Brunner, T. M., Chansangpetch, S., Clark, A.  
789 F., . . . Stamer, W. D. (2018). Consensus recommendations for trabecular meshwork  
790 cell isolation, characterization and culture. *Exp Eye Res*, *171*, 164-173.  
791 doi:10.1016/j.exer.2018.03.001
- 792 Kelley, M. J., Rose, A. Y., Keller, K. E., Hesse, H., Samples, J. R., & Acott, T. S. (2009).  
793 Stem cells in the trabecular meshwork: present and future promises. *Exp Eye Res*,  
794 *88*(4), 747-751. doi:10.1016/j.exer.2008.10.024
- 795 Kumar, A., Xu, Y., & Du, Y. (2020). Stem Cells from Human Trabecular Meshwork Hold  
796 the Potential to Develop into Ocular and Non-Ocular Lineages After Long-Term  
797 Storage. *Stem Cells Dev*, *29*(1), 49-61. doi:10.1089/scd.2019.0169
- 798 Kumar, A., Xu, Y., Yang, E., Wang, Y., & Du, Y. (2019). Fidelity of long-term  
799 cryopreserved adipose-derived stem cells for differentiation into cells of ocular and  
800 other lineages. *Exp Eye Res*, *189*, 107860. doi:10.1016/j.exer.2019.107860
- 801 Lei, Y., Overby, D. R., Boussommier-Calleja, A., Stamer, W. D., & Ethier, C. R. (2011).  
802 Outflow physiology of the mouse eye: pressure dependence and washout. *Invest*  
803 *Ophthalmol Vis Sci*, *52*(3), 1865-1871. doi:10.1167/iovs.10-6019
- 804 Liesenborghs, I., Eijssen, L. M. T., Kutmon, M., Gorgels, T., Evelo, C. T., Beckers, H. J.  
805 M., . . . Schouten, J. (2019). Comprehensive bioinformatics analysis of trabecular  
806 meshwork gene expression data to unravel the molecular pathogenesis of primary  
807 open-angle glaucoma. *Acta Ophthalmol*. doi:10.1111/aos.14154
- 808 Liton, P. B., Luna, C., Challa, P., Epstein, D. L., & Gonzalez, P. (2006). Genome-wide  
809 expression profile of human trabecular meshwork cultured cells, nonglaucomatous  
810 and primary open angle glaucoma tissue. *Mol Vis*, *12*, 774-790. Retrieved from  
811 <https://www.ncbi.nlm.nih.gov/pubmed/16862071>
- 812 Manuguerra-Gagne, R., Boulos, P. R., Ammar, A., Leblond, F. A., Kroszl, G., Pichette,  
813 V., . . . Roy, D. C. (2013). Transplantation of mesenchymal stem cells promotes tissue  
814 regeneration in a glaucoma model through laser-induced paracrine factor secretion  
815 and progenitor cell recruitment. *Stem Cells*, *31*(6), 1136-1148. doi:10.1002/stem.1364
- 816 Matsuda, T., & Cepko, C. L. (2004). Electroporation and RNA interference in the rodent  
817 retina in vivo and in vitro. *Proc Natl Acad Sci U S A*, *101*(1), 16-22.  
818 doi:10.1073/pnas.2235688100
- 819 Ophoff, R. A., Terwindt, G. M., Vergouwe, M. N., van Eijk, R., Oefner, P. J., Hoffman, S.  
820 M., . . . Frants, R. R. (1996). Familial hemiplegic migraine and episodic ataxia type-2  
821 are caused by mutations in the Ca<sup>2+</sup> channel gene CACNL1A4. *Cell*, *87*(3), 543-552.  
822 doi:10.1016/s0092-8674(00)81373-2
- 823 Pearson, C., & Martin, K. (2015). Stem cell approaches to glaucoma: from aqueous outflow  
824 modulation to retinal neuroprotection. *Prog Brain Res*, *220*, 241-256.  
825 doi:10.1016/bs.pbr.2015.04.005
- 826 Peters, J. C., Bhattacharya, S., Clark, A. F., & Zode, G. S. (2015). Increased Endoplasmic  
827 Reticulum Stress in Human Glaucomatous Trabecular Meshwork Cells and Tissues.  
828 *Invest Ophthalmol Vis Sci*, *56*(6), 3860-3868. doi:10.1167/iovs.14-16220
- 829 Quigley, H. A., & Broman, A. T. (2006). The number of people with glaucoma worldwide in  
830 2010 and 2020. *Br J Ophthalmol*, *90*(3), 262-267. doi:10.1136/bjo.2005.081224



- 831 Raviola, G. (1982). Schwalbe line's cells: a new cell type in the trabecular meshwork of  
832 *Macaca mulatta*. *Invest Ophthalmol Vis Sci*, 22(1), 45-56. Retrieved from  
833 <https://www.ncbi.nlm.nih.gov/pubmed/7056624>
- 834 Rolle, T., Dallorto, L., Briamonte, C., & Penna, R. R. (2014). Retinal nerve fibre layer and  
835 macular thickness analysis with Fourier domain optical coherence tomography in  
836 subjects with a positive family history for primary open angle glaucoma. *Br J*  
837 *Ophthalmol*, 98(9), 1240-1244. doi:10.1136/bjophthalmol-2013-304519
- 838 Sena, D. F., & Lindsley, K. (2017). Neuroprotection for treatment of glaucoma in adults.  
839 *Cochrane Database Syst Rev*, 1, CD006539. doi:10.1002/14651858.CD006539.pub4
- 840 Shoji, T., Zangwill, L. M., Akagi, T., Saunders, L. J., Yarmohammadi, A., Manalastas, P. I.  
841 C., . . . Weinreb, R. N. (2017). Progressive Macula Vessel Density Loss in Primary  
842 Open-Angle Glaucoma: A Longitudinal Study. *Am J Ophthalmol*, 182, 107-117.  
843 doi:10.1016/j.ajo.2017.07.011
- 844 Stern, J. H., Tian, Y., Funderburgh, J., Pellegrini, G., Zhang, K., Goldberg, J. L., . . . Temple,  
845 S. (2018). Regenerating Eye Tissues to Preserve and Restore Vision. *Cell Stem Cell*,  
846 22(6), 834-849. doi:10.1016/j.stem.2018.05.013
- 847 Sundaresan, Y., Veerappan, M., Ramasamy, K. S., & Chidambaranathan, G. P. (2019).  
848 Identification, quantification and age-related changes of human trabecular meshwork  
849 stem cells. *Eye Vis (Lond)*, 6, 31. doi:10.1186/s40662-019-0156-z
- 850 Szklarczyk, D., Gable, A. L., Lyon, D., Junge, A., Wyder, S., Huerta-Cepas, J., . . . Mering,  
851 C. V. (2019). STRING v11: protein-protein association networks with increased  
852 coverage, supporting functional discovery in genome-wide experimental datasets.  
853 *Nucleic Acids Res*, 47(D1), D607-D613. doi:10.1093/nar/gky1131
- 854 Tamm, E. R. (2002). Myocilin and glaucoma: facts and ideas. *Prog Retin Eye Res*, 21(4),  
855 395-428. Retrieved from <https://www.ncbi.nlm.nih.gov/pubmed/12150989>
- 856 Urban, J. P. (2002). The role of the physicochemical environment in determining disc cell  
857 behaviour. *Biochem Soc Trans*, 30(Pt 6), 858-864. doi:10.1042/bst0300858
- 858 Villegas, S. N., Rothova, M., Barrios-Llerena, M. E., Pulina, M., Hadjantonakis, A. K., Le  
859 Bihan, T., . . . Brickman, J. M. (2013). PI3K/Akt1 signalling specifies foregut  
860 precursors by generating regionalized extra-cellular matrix. *Elife*, 2, e00806.  
861 doi:10.7554/eLife.00806
- 862 Vranka, J. A., Kelley, M. J., Acott, T. S., & Keller, K. E. (2015). Extracellular matrix in the  
863 trabecular meshwork: intraocular pressure regulation and dysregulation in glaucoma.  
864 *Exp Eye Res*, 133, 112-125. doi:10.1016/j.exer.2014.07.014
- 865 Wang, Y., Osakue, D., Yang, E., Zhou, Y., Gong, H., Xia, X., & Du, Y. (2019). Endoplasmic  
866 Reticulum Stress Response of Trabecular Meshwork Stem Cells and Trabecular  
867 Meshwork Cells and Protective Effects of Activated PERK Pathway. *Invest*  
868 *Ophthalmol Vis Sci*, 60(1), 265-273. doi:10.1167/iovs.18-25477
- 869 Wuertz, K., Godburn, K., Neidlinger-Wilke, C., Urban, J., & Iatridis, J. C. (2008). Behavior  
870 of mesenchymal stem cells in the chemical microenvironment of the intervertebral  
871 disc. *Spine (Phila Pa 1976)*, 33(17), 1843-1849. doi:10.1097/BRS.0b013e31817b8f53
- 872 Xiong, S., Xu, Y., Wang, Y., Kumar, A., Peters, D. M., & Du, Y. (2020). alpha5beta1  
873 Integrin Promotes Anchoring and Integration of Transplanted Stem Cells to the

- 874 Trabecular Meshwork in the Eye for Regeneration. *Stem Cells Dev.*  
875 doi:10.1089/scd.2019.0254
- 876 Yun, H., Lathrop, K. L., Yang, E., Sun, M., Kagemann, L., Fu, V., . . . Du, Y. (2014). A  
877 laser-induced mouse model with long-term intraocular pressure elevation. *PLoS One*,  
878 9(9), e107446. doi:10.1371/journal.pone.0107446
- 879 Yun, H., Wang, Y., Zhou, Y., Wang, K., Sun, M., Stolz, D. B., . . . Du, Y. (2018). Human  
880 stem cells home to and repair laser-damaged trabecular meshwork in a mouse model.  
881 *Commun Biol*, 1, 216. doi:10.1038/s42003-018-0227-z
- 882 Yun, H., Zhou, Y., Wills, A., & Du, Y. (2016). Stem Cells in the Trabecular Meshwork for  
883 Regulating Intraocular Pressure. *J Ocul Pharmacol Ther*, 32(5), 253-260.  
884 doi:10.1089/jop.2016.0005
- 885 Zadoo, S., Nguyen, A., Zode, G., & Hulleman, J. D. (2016). A Novel Luciferase Assay For  
886 Sensitively Monitoring Myocilin Variants in Cell Culture. *Invest Ophthalmol Vis Sci*,  
887 57(4), 1939-1950. doi:10.1167/iovs.15-18789
- 888 Zhou, Y., Grinchuk, O., & Tomarev, S. I. (2008). Transgenic mice expressing the Tyr437His  
889 mutant of human myocilin protein develop glaucoma. *Invest Ophthalmol Vis Sci*,  
890 49(5), 1932-1939. doi:10.1167/iovs.07-1339
- 891 Zhou, Y., Xia, X., Yang, E., Wang, Y., Marra, K. G., Ethier, C. R., . . . Du, Y. (2020).  
892 Adipose-derived stem cells integrate into trabecular meshwork with glaucoma  
893 treatment potential. *FASEB J*, 34(5), 7160-7177. doi:10.1096/fj.201902326R
- 894 Zhu, W., Gramlich, O. W., Laboissonniere, L., Jain, A., Sheffield, V. C., Trimarchi, J.  
895 M., . . . Kuehn, M. H. (2016). Transplantation of iPSC-derived TM cells rescues  
896 glaucoma phenotypes in vivo. *Proc Natl Acad Sci U S A*, 113(25), E3492-3500.  
897 doi:10.1073/pnas.1604153113
- 898 Zode, G. S., Bugge, K. E., Mohan, K., Grozdanic, S. D., Peters, J. C., Koehn, D. R., . . .  
899 Sheffield, V. C. (2012). Topical ocular sodium 4-phenylbutyrate rescues glaucoma in  
900 a myocilin mouse model of primary open-angle glaucoma. *Invest Ophthalmol Vis Sci*,  
901 53(3), 1557-1565. doi:10.1167/iovs.11-8837
- 902 Zode, G. S., Kuehn, M. H., Nishimura, D. Y., Searby, C. C., Mohan, K., Grozdanic, S.  
903 D., . . . Sheffield, V. C. (2011). Reduction of ER stress via a chemical chaperone  
904 prevents disease phenotypes in a mouse model of primary open angle glaucoma. *J*  
905 *Clin Invest*, 121(9), 3542-3553. doi:10.1172/JCI58183
- 906
